# Supplementary material for: Mapping exclusive breastfeeding in Africa between 2000 and 2017
Source: PubMed Central journal article supplement (PMC6749549; doi:10.1038/s41591-019-0525-0), 2019-07-22
Supplement: 41591_2019_525_MOESM1_ESM.pdf [file 41591_2019_525_MOESM1_ESM.pdf]

In the format provided by the authors and unedited.

# Mapping exclusive breastfeeding in Africa between 2000 and 2017

Natalia V. Bhattacharjee<sup>1</sup>, Lauren E. Schaeffer<sup>1</sup> , Laurie B. Marczak<sup>1</sup>, Jennifer M. Ross<sup>1,2,3</sup> , Scott J. Swartz<sup>3</sup>, James Albright<sup>1</sup>, William M. Gardner<sup>1</sup> , Chloe Shields<sup>1</sup> , Amber Sligar<sup>1</sup>, Megan F. Schipp<sup>1</sup>, Brandon V. Pickering<sup>1</sup>, Nathaniel J. Henry<sup>1</sup> , Kimberly B. Johnson<sup>1</sup>, Celia Louie<sup>1</sup>, Michael A. Cork<sup>1</sup>, Krista M. Steuben<sup>1</sup>, Alice Lazzar-Atwood<sup>1</sup>, Dan Lu<sup>1</sup>, Damaris K. Kinyoki<sup>1</sup>, Aaron Osgood-Zimmerman<sup>1</sup>, Lucas Earl<sup>1</sup>, Jonathan F. Mosser<sup>1,4</sup>, Aniruddha Deshpande<sup>1</sup> , Roy Burstein<sup>1</sup>, Lauren P. Woyczynski<sup>1</sup>, Katherine F. Wilson<sup>1</sup> , John D. VanderHeide<sup>1</sup>, Kirsten E. Wiens<sup>1</sup>, Robert C. Reiner Jr<sup>1,4</sup>, Ellen G. Piwoz<sup>5</sup>, Rahul Rawat<sup>5</sup>, Benn Sartorius<sup>4,6</sup>, Nicole Davis Weaver<sup>1</sup> , Molly R. Nixon<sup>1</sup>, David L. Smith<sup>1,4</sup> , Nicholas J. Kassebaum<sup>1,7</sup>, Emmanuela Gakidou<sup>1,4</sup>, Stephen S. Lim<sup>1,4</sup>, Ali H. Mokdad<sup>1,4</sup>, Christopher J. L. Murray<sup>1,4</sup>, Laura Dwyer-Lindgren<sup>1,4,8</sup>  and Simon I. Hay<sup>1,4,8\*</sup> 

---

<sup>1</sup>Institute for Health Metrics and Evaluation, University of Washington, Seattle, WA, USA. <sup>2</sup>Department of Global Health, University of Washington, Seattle, WA, USA. <sup>3</sup>Department of Medicine, University of Washington, Seattle, WA, USA. <sup>4</sup>Department of Health Metrics Sciences, University of Washington, Seattle, WA, USA. <sup>5</sup>Bill & Melinda Gates Foundation, Seattle, WA, USA. <sup>6</sup>Faculty of Infectious and Tropical Diseases, London School of Hygiene & Tropical Medicine, London, UK. <sup>7</sup>Department of Anesthesiology and Pain Medicine, University of Washington, Seattle, WA, USA. <sup>8</sup>These authors jointly supervised this work: Laura Dwyer-Lindgren, Simon I. Hay. \*e-mail: [sihay@uw.edu](mailto:sihay@uw.edu)

## Contents

|                                                                                                                                             |    |
|---------------------------------------------------------------------------------------------------------------------------------------------|----|
| Supplementary Table 1. Compliance with the Guidelines for Accurate and Transparent Health Estimates Reporting (GATHER) .....                | 2  |
| Supplementary Table 2. Household survey microdata used in mapping exclusive breastfeeding among infants under 6 months .....                | 4  |
| Supplementary Table 3. Household survey reports used in mapping exclusive breastfeeding among infants under 6 months .....                  | 29 |
| Supplementary Table 4. Data excluded from both the geostatistical model and GBD estimates .....                                             | 31 |
| Supplementary Table 5. Data excluded from GBD estimates but included in geostatistical model .....                                          | 32 |
| Supplementary Table 6. Data excluded from geostatistical model but included in GBD estimates .....                                          | 33 |
| Supplementary Table 7. Sources for covariates used in mapping .....                                                                         | 34 |
| Supplementary Table 8. Fitted model parameters .....                                                                                        | 37 |
| Supplementary Table 9. In-sample and out-of-sample validation metrics from the covariate sensitivity analysis by level of aggregation ..... | 38 |
| Supplementary Table 10. List of surveys used in the geostatistical model that are not nationally representative .....                       | 39 |
| Supplementary Table 11. National and subnational achievement of WHO GNT (2017) .....                                                        | 41 |
| Supplementary Table 12. National and subnational achievement of WHO GNT (2025) .....                                                        | 41 |

**Supplementary Table 1. Compliance with the Guidelines for Accurate and Transparent Health Estimates Reporting (GATHER)**

| Item #                                                                                                | Checklist item                                                                                                                                                                                                                                                                                                                                                                            | Description of Compliance                                                                                                                                                                                                                                                 |
|-------------------------------------------------------------------------------------------------------|-------------------------------------------------------------------------------------------------------------------------------------------------------------------------------------------------------------------------------------------------------------------------------------------------------------------------------------------------------------------------------------------|---------------------------------------------------------------------------------------------------------------------------------------------------------------------------------------------------------------------------------------------------------------------------|
| <b>Objectives and funding</b>                                                                         |                                                                                                                                                                                                                                                                                                                                                                                           |                                                                                                                                                                                                                                                                           |
| 1                                                                                                     | Define the indicator(s), populations (including age, sex, and geographic entities), and time period(s) for which estimates were made.                                                                                                                                                                                                                                                     | Abstract; Main text                                                                                                                                                                                                                                                       |
| 2                                                                                                     | List the funding sources for the work.                                                                                                                                                                                                                                                                                                                                                    | Main text: End Notes section                                                                                                                                                                                                                                              |
| <b>Data Inputs</b>                                                                                    |                                                                                                                                                                                                                                                                                                                                                                                           |                                                                                                                                                                                                                                                                           |
| <i>For all data inputs from multiple sources that are synthesized as part of the study:</i>           |                                                                                                                                                                                                                                                                                                                                                                                           |                                                                                                                                                                                                                                                                           |
| 3                                                                                                     | Describe how the data were identified and how the data were accessed.                                                                                                                                                                                                                                                                                                                     | Methods: Data extraction and processing section                                                                                                                                                                                                                           |
| 4                                                                                                     | Specify the inclusion and exclusion criteria. Identify all ad-hoc exclusions.                                                                                                                                                                                                                                                                                                             | Methods: Data extraction and processing section; Supplementary Tables 4–6                                                                                                                                                                                                 |
| 5                                                                                                     | Provide information on all included data sources and their main characteristics. For each data source used, report reference information or contact name/institution, population represented, data collection method, year(s) of data collection, sex and age range, diagnostic criteria or measurement method, and sample size, as relevant.                                             | Extended Data Figure 5; Supplementary Tables 2 and 3                                                                                                                                                                                                                      |
| 6                                                                                                     | Identify and describe any categories of input data that have potentially important biases (e.g., based on characteristics listed in item 5).                                                                                                                                                                                                                                              | Methods: Data extraction and processing and Data Accuracy sections                                                                                                                                                                                                        |
| <i>For data inputs that contribute to the analysis but were not synthesized as part of the study:</i> |                                                                                                                                                                                                                                                                                                                                                                                           |                                                                                                                                                                                                                                                                           |
| 7                                                                                                     | Describe and give sources for any other data inputs.                                                                                                                                                                                                                                                                                                                                      | Supplementary Table 6                                                                                                                                                                                                                                                     |
| <i>For all data inputs:</i>                                                                           |                                                                                                                                                                                                                                                                                                                                                                                           |                                                                                                                                                                                                                                                                           |
| 8                                                                                                     | Provide all data inputs in a file format from which data can be efficiently extracted (e.g., a spreadsheet rather than a PDF), including all relevant meta-data listed in item 5. For any data inputs that cannot be shared because of ethical or legal reasons, such as third-party ownership, provide a contact name or the name of the institution that retains the right to the data. | Available through <a href="http://ghdx.healthdata.org/record/ihme-data/africa-exclusive-breastfeeding-prevalence-geospatial-estimates-2000-2017">http://ghdx.healthdata.org/record/ihme-data/africa-exclusive-breastfeeding-prevalence-geospatial-estimates-2000-2017</a> |
| <b>Data analysis</b>                                                                                  |                                                                                                                                                                                                                                                                                                                                                                                           |                                                                                                                                                                                                                                                                           |
| 9                                                                                                     | Provide a conceptual overview of the data analysis method. A diagram may be helpful.                                                                                                                                                                                                                                                                                                      | Methods: Data extraction and processing section                                                                                                                                                                                                                           |

|                               |                                                                                                                                                                                                                                                                         |                                                                                                                                                                                                                                                                           |
|-------------------------------|-------------------------------------------------------------------------------------------------------------------------------------------------------------------------------------------------------------------------------------------------------------------------|---------------------------------------------------------------------------------------------------------------------------------------------------------------------------------------------------------------------------------------------------------------------------|
| <b>10</b>                     | Provide a detailed description of all steps of the analysis, including mathematical formulae. This description should cover, as relevant, data cleaning, data pre-processing, data adjustments and weighting of data sources, and mathematical or statistical model(s). | Methods: Data extraction and processing and Statistical analysis sections                                                                                                                                                                                                 |
| <b>11</b>                     | Describe how candidate models were evaluated and how the final model(s) were selected.                                                                                                                                                                                  | Methods: Statistical analysis section                                                                                                                                                                                                                                     |
| <b>12</b>                     | Provide the results of an evaluation of model performance, if done, as well as the results of any relevant sensitivity analysis.                                                                                                                                        | Methods: Statistical analysis section                                                                                                                                                                                                                                     |
| <b>13</b>                     | Describe methods for calculating uncertainty of the estimates. State which sources of uncertainty were, and were not, accounted for in the uncertainty analysis.                                                                                                        | Methods: Statistical analysis and Limitations sections                                                                                                                                                                                                                    |
| <b>14</b>                     | State how analytic or statistical source code used to generate estimates can be accessed.                                                                                                                                                                               | Methods: Code Availability section                                                                                                                                                                                                                                        |
| <b>Results and Discussion</b> |                                                                                                                                                                                                                                                                         |                                                                                                                                                                                                                                                                           |
| <b>15</b>                     | Provide published estimates in a file format from which data can be efficiently extracted.                                                                                                                                                                              | Available through <a href="http://ghdx.healthdata.org/record/ihme-data/africa-exclusive-breastfeeding-prevalence-geospatial-estimates-2000-2017">http://ghdx.healthdata.org/record/ihme-data/africa-exclusive-breastfeeding-prevalence-geospatial-estimates-2000-2017</a> |
| <b>16</b>                     | Report a quantitative measure of the uncertainty of the estimates (e.g. uncertainty intervals).                                                                                                                                                                         | Main text; Methods: Statistical analysis section; Figure 1f                                                                                                                                                                                                               |
| <b>17</b>                     | Interpret results in light of existing evidence. If updating a previous set of estimates, describe the reasons for changes in estimates.                                                                                                                                | Main text                                                                                                                                                                                                                                                                 |
| <b>18</b>                     | Discuss limitations of the estimates. Include a discussion of any modelling assumptions or data limitations that affect interpretation of the estimates.                                                                                                                | Methods: Limitations section                                                                                                                                                                                                                                              |

**Supplementary Table 2. Household survey microdata used in mapping exclusive breastfeeding among infants under 6 months**

| Country | Year(s)   | Name                                                | Geographic detail | Citation                                                                                                                                                                                                                                 | NID <sup>♦</sup> |
|---------|-----------|-----------------------------------------------------|-------------------|------------------------------------------------------------------------------------------------------------------------------------------------------------------------------------------------------------------------------------------|------------------|
| Algeria | 2012-2013 | Algeria Multiple Indicator Cluster Survey 2012-2013 | Admin 3           | Ministry of Health and Population (Algeria), United Nations Children's Fund (UNICEF). Algeria Multiple Indicator Cluster Survey 2012-2013. New York, United States: United Nations Children's Fund (UNICEF), 2016.                       | 210614           |
| Angola  | 2001      | Angola Multiple Indicator Cluster Survey 2001       | Admin 1           | National Institute of Statistics (Angola), United Nations Children's Fund (UNICEF). Angola Multiple Indicator Cluster Survey 2001. New York, United States: United Nations Children's Fund (UNICEF).                                     | 687              |
| Angola  | 2015-2016 | Angola Demographic and Health Survey 2015-2016      | GPS               | ICF International, Ministry of Health (Angola), National Institute of Statistics (Angola), United Nations Children's Fund (UNICEF). Angola Demographic and Health Survey 2015-2016. Fairfax, United States: ICF International, 2017.     | 218555           |
| Benin   | 2001      | Benin Demographic and Health Survey 2001            | GPS               | National Institute of Statistics and Economic Analysis (INSAE) (Benin), ORC Macro. Benin Demographic and Health Survey 2001. Fairfax, United States: ICF International.                                                                  | 18950            |
| Benin   | 2006      | Benin Demographic and Health Survey 2006            | Admin 1           | Macro International, Inc, National Institute of Statistics and Economic Analysis (INSAE) (Benin), National Program Against AIDS (PNLS) (Benin). Benin Demographic and Health Survey 2006. Fairfax, United States: ICF International.     | 18959            |
| Benin   | 2011-2012 | Benin Demographic and Health Survey 2011-2012       | GPS               | ICF International, National Institute of Statistics and Economic Analysis (INSAE) (Benin), National Program Against AIDS (PNLS) (Benin). Benin Demographic and Health Survey 2011-2012. Fairfax, United States: ICF International, 2014. | 79839            |
| Benin   | 2014      | Benin Multiple Indicator Cluster Survey 2014        | Admin 1           | National Institute of Statistics and Economic Analysis (INSAE) (Benin), United Nations Children's Fund (UNICEF). Benin Multiple Indicator Cluster Survey 2014. New York, United States: United Nations Children's Fund (UNICEF), 2017.   | 206075           |

| Country      | Year(s)   | Name                                                 | Geographic detail | Citation                                                                                                                                                                                                                                   | NID <sup>♦</sup> |
|--------------|-----------|------------------------------------------------------|-------------------|--------------------------------------------------------------------------------------------------------------------------------------------------------------------------------------------------------------------------------------------|------------------|
| Botswana     | 2000      | Botswana Multiple Indicator Cluster Survey 2000      | Admin 1           | Central Statistics Office (Botswana), United Nations Children's Fund (UNICEF). Botswana Multiple Indicator Cluster Survey 2000. New York, United States: United Nations Children's Fund (UNICEF), 2015.                                    | 1404             |
| Botswana     | 2007-2008 | Botswana Family Health Survey 2007-2008              | Admin 1           | Central Statistics Office (Botswana). Botswana Family Health Survey 2007-2008. Gaborone, Botswana: Central Statistics Office (Botswana), 2009.                                                                                             | 22125†           |
| Burkina Faso | 1998-1999 | Burkina Faso Demographic and Health Survey 1998-1999 | GPS               | Macro International, Inc, National Institute of Statistics and Demography (Burkina Faso). Burkina Faso Demographic and Health Survey 1998-1999. Fairfax, United States: ICF International.                                                 | 19076            |
| Burkina Faso | 2003      | Burkina Faso Demographic and Health Survey 2003      | GPS               | Macro International, Inc, National Institute of Statistics and Demography (Burkina Faso). Burkina Faso Demographic and Health Survey 2003. Fairfax, United States: ICF International.                                                      | 19088            |
| Burkina Faso | 2006      | Burkina Faso Multiple Indicator Cluster Survey 2006  | Admin 1           | National Institute of Statistics and Demography (Burkina Faso), United Nations Children's Fund (UNICEF). Burkina Faso Multiple Indicator Cluster Survey 2006. New York, United States: United Nations Children's Fund (UNICEF).            | 1927             |
| Burkina Faso | 2010-2011 | Burkina Faso Demographic and Health Survey 2010-2011 | GPS               | ICF Macro, Ministry of Health (Burkina Faso), National Institute of Statistics and Demography (Burkina Faso). Burkina Faso Demographic and Health Survey 2010-2011. Fairfax, United States: ICF International.                             | 19133            |
| Burundi      | 2000      | Burundi Multiple Indicator Cluster Survey 2000       | Admin 2           | Burundi Institute of Statistics and Economic Studies, United Nations Children's Fund (UNICEF). Burundi Multiple Indicator Cluster Survey 2000. New York, United States: United Nations Children's Fund (UNICEF).                           | 1994             |
| Burundi      | 2010-2011 | Burundi Demographic and Health Survey 2010-2011      | GPS               | Burundi Institute of Statistics and Economic Studies, ICF International, Ministry of Public Health and the Fight Against AIDS (Burundi). Burundi Demographic and Health Survey 2010-2011. Fairfax, United States: ICF International, 2012. | 30431            |

| Country                  | Year(s)   | Name                                                            | Geographic detail | Citation                                                                                                                                                                                                                                                                                                                                    | NID <sup>♦</sup> |
|--------------------------|-----------|-----------------------------------------------------------------|-------------------|---------------------------------------------------------------------------------------------------------------------------------------------------------------------------------------------------------------------------------------------------------------------------------------------------------------------------------------------|------------------|
| Burundi                  | 2016-2017 | Burundi Demographic and Health Survey 2016-2017                 | GPS               | Burundi Institute of Statistics and Economic Studies, ICF International, Ministry of Public Health and the Fight Against AIDS (Burundi). Burundi Demographic and Health Survey 2016-2017. Fairfax, United States: ICF International, 2018.                                                                                                  | 286766           |
| Cameroon                 | 1998      | Cameroon Demographic and Health Survey 1998                     | Admin 1           | Central Bureau of the Census and Population Studies (Cameroon), Macro International, Inc. Cameroon Demographic and Health Survey 1998. Fairfax, United States: ICF International.                                                                                                                                                           | 19198            |
| Cameroon                 | 2004      | Cameroon Demographic and Health Survey 2004                     | GPS               | Macro International, Inc, National Institute of Statistics (Cameroon). Cameroon Demographic and Health Survey 2004. Fairfax, United States: ICF International.                                                                                                                                                                              | 19211            |
| Cameroon                 | 2006      | Cameroon Multiple Indicator Cluster Survey 2006                 | Admin 1           | United Nations Children's Fund (UNICEF), National Institute of Statistics (Cameroon). Cameroon Multiple Indicator Cluster Survey 2006. New York, United States: United Nations Children's Fund (UNICEF).                                                                                                                                    | 2063             |
| Cameroon                 | 2011      | Cameroon Demographic and Health Survey 2011                     | GPS               | ICF International, Ministry of Economy, Planning and Regional Development (Cameroon), Ministry of Public Health (Cameroon), National Institute of Statistics (Cameroon), Pasteur Center of Cameroon. Cameroon Demographic and Health Survey 2011. Fairfax, United States: ICF International.                                                | 19274            |
| Cameroon                 | 2014      | Cameroon Multiple Indicator Cluster Survey 2014                 | Admin 3           | Ministry of Public Health (Cameroon), National Institute of Statistics (Cameroon), United Nations Children's Fund (UNICEF). Cameroon Multiple Indicator Cluster Survey 2014. New York, United States: United Nations Children's Fund (UNICEF), 2017.                                                                                        | 244455           |
| Central African Republic | 2000      | Central African Republic Multiple Indicator Cluster Survey 2000 | Admin 1           | Division of Statistics and Economic Studies (Central African Republic), Ministry of Economy, Planning and International Cooperation (Central African Republic), United Nations Children's Fund (UNICEF). Central African Republic Multiple Indicator Cluster Survey 2000. New York, United States: United Nations Children's Fund (UNICEF). | 2209             |

| Country                  | Year(s)   | Name                                                                 | Geographic detail | Citation                                                                                                                                                                                                                                                                                                       | NID <sup>♦</sup> |
|--------------------------|-----------|----------------------------------------------------------------------|-------------------|----------------------------------------------------------------------------------------------------------------------------------------------------------------------------------------------------------------------------------------------------------------------------------------------------------------|------------------|
| Central African Republic | 2006      | Central African Republic Multiple Indicator Cluster Survey 2006      | Admin 1           | United Nations Children's Fund (UNICEF). Central African Republic Multiple Indicator Cluster Survey 2006. New York, United States: United Nations Children's Fund (UNICEF).                                                                                                                                    | 2223             |
| Central African Republic | 2010-2011 | Central African Republic Multiple Indicator Cluster Survey 2010-2011 | Admin 1           | Central African Institute of Statistics, Economic and Social Studies (ICASEES) (Central African Republic), ICF International. Central African Republic Multiple Indicator Cluster Survey 2010-2011. Fairfax, United States: ICF International, 2013.                                                           | 82832            |
| Chad                     | 2000      | Chad Multiple Indicator Cluster Survey 2000                          | Admin 1           | United Nations Children's Fund (UNICEF), Census Bureau (Chad), National Institute of Statistical, Economic and Demographic Studies (Chad). Chad Multiple Indicator Cluster Survey 2000. New York, United States: United Nations Children's Fund (UNICEF).                                                      | 2244             |
| Chad                     | 2010      | Chad Multiple Indicator Cluster Survey 2010                          | Admin 1           | Ministry of Planning, Economy, and International Cooperation (Chad), National Institute of Statistical, Economic and Demographic Studies (Chad), United Nations Children's Fund (UNICEF). Chad Multiple Indicator Cluster Survey 2010. New York, United States: United Nations Children's Fund (UNICEF), 2014. | 76701            |
| Chad                     | 2014-2015 | Chad Demographic and Health Survey 2014-2015                         | GPS               | ICF International, National Institute of Statistical, Economic and Demographic Studies (Chad). Chad Demographic and Health Survey 2014-2015. Fairfax, United States: ICF International, 2016.                                                                                                                  | 157025           |
| Comoros                  | 2000      | Comoros Multiple Indicator Cluster Survey 2000                       | Admin 1           | United Nations Development Programme (UNDP), United Nations Children's Fund (UNICEF). Comoros Multiple Indicator Cluster Survey 2000. New York, United States: United Nations Children's Fund (UNICEF).                                                                                                        | 3114             |
| Comoros                  | 2012-2013 | Comoros Demographic and Health Survey 2012-2013                      | GPS               | General Directorate of Statistics and Forecasting (Comoros), ICF International. Comoros Demographic and Health Survey 2012-2013. Fairfax, United States: ICF International.                                                                                                                                    | 76850            |



| Country                          | Year(s)   | Name                                                                    | Geographic detail | Citation                                                                                                                                                                                                                                                                                                  | NID <sup>♦</sup> |
|----------------------------------|-----------|-------------------------------------------------------------------------|-------------------|-----------------------------------------------------------------------------------------------------------------------------------------------------------------------------------------------------------------------------------------------------------------------------------------------------------|------------------|
| Congo                            | 2011-2012 | Congo Demographic and Health Survey 2011-2012                           | Admin 1           | ICF International, Ministry of Health (Congo, Rep.), National Center for Statistics and Economic Studies (Congo, Rep.). Congo Demographic and Health Survey 2011-2012. Fairfax, United States: ICF International.                                                                                         | 56151            |
| Côte d'Ivoire                    | 1998-1999 | Côte d'Ivoire Demographic and Health Survey 1998-1999                   | GPS               | Macro International, Inc, National Institute of Statistics (Côte d'Ivoire). Côte d'Ivoire Demographic and Health Survey 1998-1999. Calverton, United States: Macro International, Inc.                                                                                                                    | 18531            |
| Côte d'Ivoire                    | 2000      | Côte d'Ivoire Multiple Indicator Cluster Survey 2000                    | Admin 1           | National School for Statistics and Economics Applied (ENSEA), United Nations Children's Fund (UNICEF), United Nations Educational, Scientific and Cultural Organization (UNESCO). Côte d'Ivoire Multiple Indicator Cluster Survey 2000. New York, United States: United Nations Children's Fund (UNICEF). | 26444            |
| Côte d'Ivoire                    | 2006      | Côte d'Ivoire Multiple Indicator Cluster Survey 2006                    | Admin 3           | United Nations Children's Fund (UNICEF), National Institute of Statistics (Côte d'Ivoire). Côte d'Ivoire Multiple Indicator Cluster Survey 2006. New York, United States: United Nations Children's Fund (UNICEF).                                                                                        | 26433            |
| Côte d'Ivoire                    | 2011-2012 | Côte d'Ivoire Demographic and Health Survey 2011-2012                   | GPS               | ICF International, Ministry of the Fight Against AIDS (Côte d'Ivoire), National Institute of Statistics (Côte d'Ivoire). Côte d'Ivoire Demographic and Health Survey 2011-2012. Fairfax, United States: ICF International.                                                                                | 18533            |
| Côte d'Ivoire                    | 2016      | Côte d'Ivoire Multiple Indicator Cluster Survey 2016                    | Admin 1           | National Institute of Statistics (Côte d'Ivoire), United Nations Children's Fund (UNICEF). Cote d'Ivoire Multiple Indicator Cluster Survey 2016. New York, United States: United Nations Children's Fund (UNICEF), 2018.                                                                                  | 218611           |
| Democratic Republic of the Congo | 2001      | Democratic Republic of the Congo Multiple Indicator Cluster Survey 2001 | Admin 1           | Ministry of Planning and Reconstruction (Congo, DR), United Nations Children's Fund (UNICEF). Congo, DR Multiple Indicator Cluster Survey 2001. New York, United States: United Nations Children's Fund (UNICEF).                                                                                         | 3161             |

| Country                          | Year(s)   | Name                                                                     | Geographic detail | Citation                                                                                                                                                                                                                                                                                                                          | NID <sup>♦</sup> |
|----------------------------------|-----------|--------------------------------------------------------------------------|-------------------|-----------------------------------------------------------------------------------------------------------------------------------------------------------------------------------------------------------------------------------------------------------------------------------------------------------------------------------|------------------|
| Democratic Republic of the Congo | 2007      | Democratic Republic of the Congo Demographic and Health Survey 2007      | GPS               | Macro International, Inc, Ministry of Planning (Congo, DR). Democratic Republic of the Congo Demographic and Health Survey 2007. Fairfax, United States: ICF International.                                                                                                                                                       | 19381            |
| Democratic Republic of the Congo | 2010      | Democratic Republic of the Congo Multiple Indicator Cluster Survey 2010  | GPS               | National Statistical Institute (Congo, DR), Ministry of Planning (Congo, DR), United Nations Children's Fund (UNICEF). Congo, DR Multiple Indicator Cluster Survey 2010. New York, United States: United Nations Children's Fund (UNICEF).                                                                                        | 26998            |
| Democratic Republic of the Congo | 2013-2014 | Democratic Republic of the Congo Demographic and Health Survey 2013-2014 | GPS               | ICF International, Ministry of Planning and Monitoring Implementation of the Revolution of Modernity (Congo, DR), Ministry of Public Health (Congo, DR), National Institute of Statistics (Congo, DR). Democratic Republic of the Congo Demographic and Health Survey 2013-2014. Fairfax, United States: ICF International, 2014. | 76878            |
| Egypt                            | 2000      | Egypt Demographic and Health Survey 2000                                 | GPS               | Macro International, Inc, Population Council (Egypt). Egypt Demographic and Health Survey 2000. Fairfax, United States: ICF International.                                                                                                                                                                                        | 19511            |
| Egypt                            | 2003      | Egypt Interim Demographic and Health Survey 2003                         | GPS               | El-Zanaty and Associates, Macro International, Inc, Ministry of Health and Population (Egypt), Population Council (Egypt). Egypt Interim Demographic and Health Survey 2003. Fairfax, United States: ICF International.                                                                                                           | 19529            |
| Egypt                            | 2008      | Egypt Demographic and Health Survey 2008                                 | GPS               | El-Zanaty and Associates, Macro International, Inc, Ministry of Health and Population (Egypt). Egypt Demographic and Health Survey 2008. Fairfax, United States: ICF International.                                                                                                                                               | 26842            |
| Egypt                            | 2013-2014 | Egypt IPHN Rural Districts Multiple Indicator Cluster Survey 2013-2014   | Admin 1           | El-Zanaty and Associates, Ministry of Health and Population (Egypt), United Nations Children's Fund (UNICEF). Egypt IPHN Rural Districts Multiple Indicator Cluster Survey 2013-2014. New York, United States: United Nations Children's Fund (UNICEF), 2016.                                                                     | 159617           |
| Egypt                            | 2014      | Egypt Demographic and Health Survey 2014                                 | GPS               | El-Zanaty and Associates, ICF International, Ministry of Health and Population (Egypt). Egypt Demographic and Health Survey 2014. Fairfax, United States: ICF International.                                                                                                                                                      | 154897           |

| Country           | Year(s)   | Name                                                     | Geographic detail | Citation                                                                                                                                                                                                                                                   | NID <sup>♦</sup> |
|-------------------|-----------|----------------------------------------------------------|-------------------|------------------------------------------------------------------------------------------------------------------------------------------------------------------------------------------------------------------------------------------------------------|------------------|
| Equatorial Guinea | 2000      | Equatorial Guinea Multiple Indicator Cluster Survey 2000 | Admin 1           | Ministry of Planning, Economic Development and Public Investment (Equatorial Guinea), United Nations Children's Fund (UNICEF). Equatorial Guinea Multiple Indicator Cluster Survey 2000. New York, United States: United Nations Children's Fund (UNICEF). | 3655             |
| Eritrea           | 2002      | Eritrea Demographic and Health Survey 2002               | Admin 1           | Macro International, Inc, National Statistics and Evaluation Office (Eritrea). Eritrea Demographic and Health Survey 2002. Calverton, United States: Macro International, Inc.                                                                             | 19539†           |
| Ethiopia          | 2000      | Ethiopia Demographic and Health Survey 2000              | GPS               | Central Statistical Agency (Ethiopia), ORC Macro. Ethiopia Demographic and Health Survey 2000. Calverton, United States: ORC Macro, 2001.                                                                                                                  | 19571            |
| Ethiopia          | 2010-2011 | Ethiopia Demographic and Health Survey 2010-2011         | GPS               | Central Statistical Agency (Ethiopia), ICF Macro, Ministry of Health (Ethiopia). Ethiopia Demographic and Health Survey 2010-2011. Fairfax, United States: ICF International.                                                                              | 21301            |
| Ethiopia          | 2016      | Ethiopia Demographic and Health Survey 2016              | GPS               | Central Statistical Agency (Ethiopia), ICF International. Ethiopia Demographic and Health Survey 2016. Fairfax, United States: ICF International, 2017.                                                                                                    | 218568           |
| Gabon             | 2000-2001 | Gabon Demographic and Health Survey 2000-2001            | Admin 2           | General Directorate of Statistics and Economic Studies (Gabon), Macro International, Inc. Gabon Demographic and Health Survey 2000-2001. Calverton, United States: Macro International, Inc.                                                               | 19579            |
| Gabon             | 2012      | Gabon Demographic and Health Survey 2012                 | GPS               | General Directorate of Statistics (Gabon), ICF International, Ministry of Economy, Employment and Sustainable Development (Gabon), Ministry of Health (Gabon). Gabon Demographic and Health Survey 2012. Fairfax, United States: ICF International, 2013.  | 76706            |
| Ghana             | 1998-1999 | Ghana Demographic and Health Survey 1998-1999            | GPS               | Ghana Statistical Service, Macro International, Inc. Ghana Demographic and Health Survey 1998-1999. Calverton, United States: Macro International, Inc.                                                                                                    | 19614            |

| Country | Year(s)   | Name                                                       | Geographic detail | Citation                                                                                                                                                                                                                                                                                                                                                                                | NID <sup>♦</sup> |
|---------|-----------|------------------------------------------------------------|-------------------|-----------------------------------------------------------------------------------------------------------------------------------------------------------------------------------------------------------------------------------------------------------------------------------------------------------------------------------------------------------------------------------------|------------------|
| Ghana   | 2003      | Ghana Demographic and Health Survey 2003                   | GPS               | Ghana Statistical Service, Macro International, Inc. Ghana Demographic and Health Survey 2003. Calverton, United States: Macro International, Inc.                                                                                                                                                                                                                                      | 19627            |
| Ghana   | 2006      | Ghana Multiple Indicator Cluster Survey 2006               | Admin 1           | Ministry of Health (MOH) (Ghana), Ghana Statistical Service and United Nations Children's Fund (UNICEF). Ghana Multiple Indicator Cluster Survey 2006. New York, United States: United Nations Children's Fund (UNICEF).                                                                                                                                                                | 4694             |
| Ghana   | 2007-2008 | Ghana District Multiple Indicator Cluster Survey 2007-2008 | Admin 1           | Ghana Statistical Service, Ministry of Health (Ghana), United Nations Children's Fund (UNICEF). Ghana District Multiple Indicator Cluster Survey 2007-2008.                                                                                                                                                                                                                             | 160576†          |
| Ghana   | 2008      | Ghana Demographic and Health Survey 2008                   | GPS               | Ghana Statistical Service, Macro International, Inc, Ministry of Health (Ghana). Ghana Demographic and Health Survey 2008. Calverton, United States: Macro International, Inc.                                                                                                                                                                                                          | 21188            |
| Ghana   | 2010-2011 | Ghana - Accra Multiple Indicator Cluster Survey 2010-2011  | GPS               | Institute of Statistical, Social and Economic Research, University of Ghana, United Nations Children's Fund (UNICEF). Ghana - Accra Multiple Indicator Cluster Survey 2010-2011. New York, United States: United Nations Children's Fund (UNICEF), 2014.                                                                                                                                | 56241            |
| Ghana   | 2011      | Ghana Multiple Indicator Cluster Survey 2011               | GPS               | Centers for Disease Control and Prevention (CDC), Ghana Statistical Service, Government of Japan, ICF Macro, Ministry of Health (Ghana), Navrongo Health Research Centre, USAID, United Nations Children's Fund (UNICEF), United Nations Population Fund (UNFPA). Ghana Multiple Indicator Cluster Survey 2011. New York, United States: United Nations Children's Fund (UNICEF), 2013. | 63993            |
| Ghana   | 2014      | Ghana Demographic and Health Survey 2014                   | GPS               | Ghana Health Service, Ghana Statistical Service, ICF International. Ghana Demographic and Health Survey 2014. Fairfax, United States: ICF International, 2015.                                                                                                                                                                                                                          | 157027           |
| Guinea  | 1999      | Guinea Demographic and Health Survey 1999                  | GPS               | Macro International, Inc, National Statistics Directorate (Guinea). Guinea Demographic and Health Survey 1999. Calverton, United States: Macro International, Inc.                                                                                                                                                                                                                      | 19670            |

| Country       | Year(s) | Name                                                 | Geographic detail | Citation                                                                                                                                                                                                                                                                                             | NID <sup>♦</sup> |
|---------------|---------|------------------------------------------------------|-------------------|------------------------------------------------------------------------------------------------------------------------------------------------------------------------------------------------------------------------------------------------------------------------------------------------------|------------------|
| Guinea        | 2005    | Guinea Demographic and Health Survey 2005            | GPS               | Macro International, Inc, National Statistics Directorate (Guinea). Guinea Demographic and Health Survey 2005. Fairfax, United States: ICF International.                                                                                                                                            | 19683            |
| Guinea        | 2012    | Guinea Demographic and Health Survey 2012            | GPS               | ICF Macro, Ministry of Health and Public Hygiene (Guinea), National Institute of Statistics (Guinea). Guinea Demographic and Health Survey 2012. Calverton, United States: ICF Macro, 2014.                                                                                                          | 69761            |
| Guinea-Bissau | 2006    | Guinea-Bissau Multiple Indicator Cluster Survey 2006 | Admin 1           | United Nations Children's Fund (UNICEF), Government of Guinea-Bissau. Guinea-Bissau Multiple Indicator Cluster Survey 2006. New York, United States: United Nations Children's Fund (UNICEF).                                                                                                        | 4818             |
| Guinea-Bissau | 2014    | Guinea-Bissau Multiple Indicator Cluster Survey 2014 | Admin 1           | National Statistics Institute (Guinea-Bissau), United Nations Children's Fund (UNICEF). Guinea-Bissau Multiple Indicator Cluster Survey 2014. New York, United States: United Nations Children's Fund (UNICEF), 2016.                                                                                | 174049           |
| Kenya         | 1998    | Kenya Demographic and Health Survey 1998             | GPS               | Central Bureau of Statistics (Kenya), Macro International, Inc, National Council for Population Development (NCPD). Kenya Demographic and Health Survey 1998. Calverton, United States: Macro International, Inc.                                                                                    | 20132            |
| Kenya         | 2000    | Kenya Multiple Indicator Cluster Survey 2000         | GPS               | Central Bureau of Statistics (Kenya), United Nations Children's Fund (UNICEF). Kenya Multiple Indicator Cluster Survey 2000. New York, United States: United Nations Children's Fund (UNICEF).                                                                                                       | 7387             |
| Kenya         | 2003    | Kenya Demographic and Health Survey 2003             | GPS               | Centers for Disease Control and Prevention (CDC), Central Bureau of Statistics (Kenya), Macro International, Inc, Ministry of Health (Kenya), National Council for Population and Development (Kenya). Kenya Demographic and Health Survey 2003. Calverton, United States: Macro International, Inc. | 20145            |

| Country | Year(s)   | Name                                                            | Geographic detail | Citation                                                                                                                                                                                                                                                                                                                                                                                  | NID <sup>♦</sup> |
|---------|-----------|-----------------------------------------------------------------|-------------------|-------------------------------------------------------------------------------------------------------------------------------------------------------------------------------------------------------------------------------------------------------------------------------------------------------------------------------------------------------------------------------------------|------------------|
| Kenya   | 2008      | Kenya - Eastern Province Multiple Indicator Cluster Survey 2008 | GPS               | Kenya National Bureau of Statistics, United Nations Children's Fund (UNICEF). Kenya - Eastern Province Multiple Indicator Cluster Survey 2008. Nairobi, Kenya: Kenya National Bureau of Statistics.                                                                                                                                                                                       | 7401             |
| Kenya   | 2008-2009 | Kenya Demographic and Health Survey 2008-2009                   | GPS               | ICF Macro, Kenya Medical Research Institute (KEMRI), Kenya National Bureau of Statistics, Ministry of Public Health and Sanitation (Kenya), National AIDS and STI Control Program (Kenya), National Aids Control Council (NACC), National Coordinating Agency for Population and Development (Kenya). Kenya Demographic and Health Survey 2008-2009. Calverton, United States: ICF Macro. | 21365            |
| Kenya   | 2009      | Kenya - Coast Multiple Indicator Cluster Survey 2009            | Admin 1           | Kenya National Bureau of Statistics, United Nations Children's Fund (UNICEF). Kenya - Coast Multiple Indicator Cluster Survey 2009. New York, United States: United Nations Children's Fund (UNICEF), 2014.                                                                                                                                                                               | 56420            |
| Kenya   | 2011      | Kenya - Nyanza Province Multiple Indicator Cluster Survey 2011  | GPS               | Kenya National Bureau of Statistics, United Nations Children's Fund (UNICEF). Kenya - Nyanza Province Multiple Indicator Cluster Survey 2011. Nairobi, Kenya: Kenya National Bureau of Statistics.                                                                                                                                                                                        | 135416           |
| Kenya   | 2013-2014 | Kenya - Bungoma County Multiple Indicator Survey 2013-2014      | GPS               | Kenya National Bureau of Statistics, Population Studies and Research Institute, University of Nairobi (Kenya), United Nations Children's Fund (UNICEF). Kenya - Bungoma County Multiple Indicator Survey 2013-2014. New York, United States: United Nations Children's Fund (UNICEF), 2015.                                                                                               | 203654†          |
| Kenya   | 2013-2014 | Kenya - Kakamega County Multiple Indicator Survey 2013-2014     | GPS               | Kenya National Bureau of Statistics, Population Studies and Research Institute, University of Nairobi (Kenya), United Nations Children's Fund (UNICEF). Kenya - Kakamega County Multiple Indicator Survey 2013-2014. New York, United States: United Nations Children's Fund (UNICEF), 2015.                                                                                              | 203663†          |

| Country | Year(s)   | Name                                                       | Geographic detail | Citation                                                                                                                                                                                                                                                                                                           | NID <sup>♦</sup> |
|---------|-----------|------------------------------------------------------------|-------------------|--------------------------------------------------------------------------------------------------------------------------------------------------------------------------------------------------------------------------------------------------------------------------------------------------------------------|------------------|
| Kenya   | 2013-2014 | Kenya - Turkana County Multiple Indicator Survey 2013-2014 | GPS               | Kenya National Bureau of Statistics, Population Studies and Research Institute, University of Nairobi (Kenya), United Nations Children's Fund (UNICEF). Kenya - Turkana County Multiple Indicator Survey 2013-2014. New York, United States: United Nations Children's Fund (UNICEF), 2015.                        | 203664†          |
| Kenya   | 2014      | Kenya Demographic and Health Survey 2014                   | GPS               | ICF International, Kenya Medical Research Institute (KEMRI), Kenya National Bureau of Statistics, Ministry of Health (Kenya), National AIDS Control Council (Kenya), National Council for Population and Development (Kenya). Kenya Demographic and Health Survey 2014. Fairfax, United States: ICF International. | 157057           |
| Lesotho | 2004-2005 | Lesotho Demographic and Health Survey 2004-2005            | GPS               | Bureau of Statistics (Lesotho), Macro International, Inc, Ministry of Health and Social Welfare (Lesotho). Lesotho Demographic and Health Survey 2004-2005. Calverton, United States: Macro International, Inc.                                                                                                    | 20167            |
| Lesotho | 2009-2010 | Lesotho Demographic and Health Survey 2009-2010            | GPS               | ICF Macro, Ministry of Health and Social Welfare (Lesotho). Lesotho Demographic and Health Survey 2009-2010. Calverton, United States: ICF Macro.                                                                                                                                                                  | 21382            |
| Lesotho | 2014      | Lesotho Demographic and Health Survey 2014                 | GPS               | ICF International, Ministry of Health and Social Welfare (Lesotho). Lesotho Demographic and Health Survey 2014. Fairfax, United States: ICF International, 2016.                                                                                                                                                   | 157058           |
| Liberia | 2006-2007 | Liberia Demographic and Health Survey 2006-2007            | GPS               | Liberia Institute for Statistics and Geo-information Services (LISGIS), Macro International, Inc. Liberia Demographic and Health Survey 2006-2007. Calverton, United States: Macro International, Inc.                                                                                                             | 20191            |
| Liberia | 2013      | Liberia Demographic and Health Survey 2013                 | GPS               | ICF International, Liberia Institute for Statistics and Geo-information Services (LISGIS), National AIDS and STI Control Program (NACP), Ministry of Health and Social Welfare (Liberia). Liberia Demographic and Health Survey 2013.                                                                              | 77385            |

| Country    | Year(s)   | Name                                                      | Geographic detail | Citation                                                                                                                                                                                                                   | NID <sup>♦</sup> |
|------------|-----------|-----------------------------------------------------------|-------------------|----------------------------------------------------------------------------------------------------------------------------------------------------------------------------------------------------------------------------|------------------|
| Madagascar | 2000      | Madagascar Multiple Indicator Cluster Survey 2000         | Admin 1           | National Institute of Statistics (Madagascar), United Nations Children's Fund (UNICEF). Madagascar Multiple Indicator Cluster Survey 2000. New York, United States: United Nations Children's Fund (UNICEF).               | 27020            |
| Madagascar | 2003-2004 | Madagascar Demographic and Health Survey 2003-2004        | Admin 1           | Macro International, Inc, National Institute of Statistics (Madagascar). Madagascar Demographic and Health Survey 2003-2004. Calverton, United States: Macro International, Inc.                                           | 20223            |
| Madagascar | 2008-2009 | Madagascar Demographic and Health Survey 2008-2009        | GPS               | ICF Macro, National Institute of Statistics (Madagascar). Madagascar Demographic and Health Survey 2008-2009. Calverton, United States: ICF Macro, 2010.                                                                   | 21409            |
| Madagascar | 2012      | Madagascar - South Multiple Indicator Cluster Survey 2012 | GPS               | National Institute of Statistics (Madagascar), United Nations Children's Fund (UNICEF). Madagascar - South Multiple Indicator Cluster Survey 2012. New York, United States: United Nations Children's Fund (UNICEF), 2015. | 125594           |
| Malawi     | 2000      | Malawi Demographic and Health Survey 2000                 | GPS               | Macro International, Inc, National Statistical Office of Malawi. Malawi Demographic and Health Survey 2000. Calverton, United States: Macro International, Inc.                                                            | 20252            |
| Malawi     | 2004-2005 | Malawi Demographic and Health Survey 2004-2005            | GPS               | Macro International, Inc, National Statistical Office of Malawi. Malawi Demographic and Health Survey 2004-2005. Calverton, United States: Macro International, Inc.                                                       | 20263            |
| Malawi     | 2006      | Malawi Multiple Indicator Cluster Survey 2006             | Admin 2           | United Nations Children's Fund (UNICEF), National Statistics Office (Malawi). Malawi Multiple Indicator Cluster Survey 2006. New York, United States: United Nations Children's Fund (UNICEF).                             | 7919             |
| Malawi     | 2010      | Malawi Demographic and Health Survey 2010                 | GPS               | ICF Macro, National Statistical Office of Malawi. Malawi Demographic and Health Survey 2010. Calverton, United States: ICF Macro.                                                                                          | 21393            |



| Country | Year(s)   | Name                                               | Geographic detail | Citation                                                                                                                                                                                                                                                                  | NID <sup>♦</sup> |
|---------|-----------|----------------------------------------------------|-------------------|---------------------------------------------------------------------------------------------------------------------------------------------------------------------------------------------------------------------------------------------------------------------------|------------------|
| Malawi  | 2013-2014 | Malawi Multiple Indicator Cluster Survey 2013-2014 | Admin 2           | National Statistical Office of Malawi, United Nations Children's Fund (UNICEF). Malawi Multiple Indicator Cluster Survey 2013-2014. New York, United States: United Nations Children's Fund (UNICEF), 2015.                                                               | 161662           |
| Malawi  | 2015-2016 | Malawi Demographic and Health Survey 2015-2016     | GPS               | ICF International, Ministry of Health (Malawi), National Statistical Office of Malawi. Malawi Demographic and Health Survey 2015-2016. Fairfax, United States: ICF International, 2017.                                                                                   | 218581           |
| Mali    | 2001      | Mali Demographic and Health Survey 2001            | GPS               | Macro International, Inc, National Directorate of Statistics and Informatics (DNSI) (Mali), Planning and Statistics Unit, Ministry of Health (Mali). Mali Demographic and Health Survey 2001. Calverton, United States: Macro International, Inc.                         | 20315            |
| Mali    | 2006      | Mali Demographic and Health Survey 2006            | GPS               | Macro International, Inc, Ministry of Health (Mali), National Directorate of Statistics and Informatics (DNSI) (Mali). Mali Demographic and Health Survey 2006. Calverton, United States: Macro International, Inc.                                                       | 20274            |
| Mali    | 2009-2010 | Mali Multiple Indicator Cluster Survey 2009-2010   | Admin 1           | Ministry of Health (Mali), National Institute of Statistics (INSTAT) (Mali), United Nations Children's Fund (UNICEF). Mali Multiple Indicator Cluster Survey 2009-2010. New York, United States: United Nations Children's Fund (UNICEF), 2017.                           | 270627           |
| Mali    | 2012-2013 | Mali Demographic and Health Survey 2012-2013       | GPS               | ICF International, INFO-STAT (Mali), Ministry of Health (Mali), National Institute of Statistics (INSTAT) (Mali), Planning and Statistics Unit, Ministry of Health (Mali). Mali Demographic and Health Survey 2012-2013. Fairfax, United States: ICF International, 2014. | 77388            |

| Country    | Year(s)   | Name                                                   | Geographic detail | Citation                                                                                                                                                                                                                                                                | NID <sup>♦</sup> |
|------------|-----------|--------------------------------------------------------|-------------------|-------------------------------------------------------------------------------------------------------------------------------------------------------------------------------------------------------------------------------------------------------------------------|------------------|
| Mali       | 2015      | Mali Multiple Indicator Cluster Survey 2015            | Admin 1           | Ministry of Health (Mali), Ministry of Planning (Mali), National Institute of Statistics (INSTAT) (Mali), United Nations Children's Fund (UNICEF). Mali Multiple Indicator Cluster Survey 2015. New York, United States: United Nations Children's Fund (UNICEF), 2017. | 248224           |
| Mauritania | 2007      | Mauritania Multiple Indicator Cluster Survey 2007      | Admin 3           | National Office of Statistics (Mauritania), United Nations Children's Fund (UNICEF). Mauritania Multiple Indicator Cluster Survey 2007. New York, United States: United Nations Children's Fund (UNICEF).                                                               | 8115             |
| Mauritania | 2011      | Mauritania Multiple Indicator Cluster Survey 2011      | Admin 3           | National Office of Statistics (Mauritania), United Nations Children's Fund (UNICEF). Mauritania Multiple Indicator Cluster Survey 2011. New York, United States: United Nations Children's Fund (UNICEF), 2015.                                                         | 152783           |
| Mauritania | 2015      | Mauritania Multiple Indicator Cluster Survey 2015      | Admin 1           | National Office of Statistics (Mauritania), United Nations Children's Fund (UNICEF). Mauritania Multiple Indicator Cluster Survey 2015. New York, United States: United Nations Children's Fund (UNICEF), 2018.                                                         | 267343           |
| Morocco    | 2003-2004 | Morocco Demographic and Health Survey 2003-2004        | GPS               | League of Arab States, Macro International, Inc, Ministry of Health (Morocco). Morocco Demographic and Health Survey 2003-2004. Calverton, United States: Macro International, Inc.                                                                                     | 20361            |
| Mozambique | 2003-2004 | Mozambique Demographic and Health Survey 2003-2004     | Admin 1           | Macro International, Inc, National Institute of Statistics (INE) (Mozambique). Mozambique Demographic and Health Survey 2003-2004. Calverton, United States: Macro International, Inc.                                                                                  | 20394            |
| Mozambique | 2008-2009 | Mozambique Multiple Indicator Cluster Survey 2008-2009 | Admin 1           | United Nations Children's Fund (UNICEF), National Statistics Institute (Mozambique). Mozambique Multiple Indicator Cluster Survey 2008-2009. New York, United States: United Nations Children's Fund (UNICEF).                                                          | 27031            |

| Country    | Year(s)   | Name                                            | Geographic detail | Citation                                                                                                                                                                                                                          | NID <sup>♦</sup> |
|------------|-----------|-------------------------------------------------|-------------------|-----------------------------------------------------------------------------------------------------------------------------------------------------------------------------------------------------------------------------------|------------------|
| Mozambique | 2011      | Mozambique Demographic and Health Survey 2011   | GPS               | ICF Macro, Manhica Health Research Center (CISM), Ministry of Health (Mozambique), National Institute of Statistics (INE) (Mozambique). Mozambique Demographic and Health Survey 2011. Calverton, United States: ICF Macro, 2013. | 55975            |
| Namibia    | 2000      | Namibia Demographic and Health Survey 2000      | GPS               | Macro International, Inc, Ministry of Health and Social Services (Namibia), National Planning Commission (Namibia). Namibia Demographic and Health Survey 2000. Calverton, United States: Macro International, Inc.               | 20417            |
| Namibia    | 2006-2007 | Namibia Demographic and Health Survey 2006-2007 | GPS               | Macro International, Inc, Ministry of Health and Social Services (Namibia). Namibia Demographic and Health Survey 2006-2007. Calverton, United States: Macro International, Inc.                                                  | 20428            |
| Namibia    | 2013      | Namibia Demographic and Health Survey 2013      | GPS               | ICF International, Ministry of Health and Social Services (Namibia), Namibia Institute of Pathology, Namibia Statistics Agency. Namibia Demographic and Health Survey 2013. Fairfax, United States: ICF International, 2015.      | 150382           |
| Niger      | 1998      | Niger Demographic and Health Survey 1998        | GPS               | CARE International, Macro International, Inc. Niger Demographic and Health Survey 1998. Calverton, United States: Macro International, Inc.                                                                                       | 20537            |
| Niger      | 2000      | Niger Multiple Indicator Cluster Survey 2000    | Admin 2           | Government of Niger, Macro International, Inc, United Nations Children's Fund (UNICEF). Niger Multiple Indicator Cluster Survey 2000. New York, United States: United Nations Children's Fund (UNICEF).                           | 9439             |
| Niger      | 2006      | Niger Demographic and Health Survey 2006        | Admin 1           | Department of Statistics and National Accounts (Niger), Macro International, Inc. Niger Demographic and Health Survey 2006. Calverton, United States: Macro International, Inc.                                                   | 20499            |
| Niger      | 2012      | Niger Demographic and Health Survey 2012        | Admin 1           | ICF International, Ministry of Public Health (Niger), National Institute of Statistics (Niger). Niger Demographic and Health Survey 2012. Fairfax, United States: ICF International, 2014.                                        | 74393            |

| Country | Year(s)   | Name                                                                                                      | Geographic detail | Citation                                                                                                                                                                                                                                                                                                                                                                                    | NID <sup>♦</sup> |
|---------|-----------|-----------------------------------------------------------------------------------------------------------|-------------------|---------------------------------------------------------------------------------------------------------------------------------------------------------------------------------------------------------------------------------------------------------------------------------------------------------------------------------------------------------------------------------------------|------------------|
| Nigeria | 1999      | Nigeria Multiple Indicator Cluster Survey 1999                                                            | Admin 1           | National Bureau of Statistics (Nigeria), United Nations Children's Fund (UNICEF). Nigeria Multiple Indicator Cluster Survey 1999. Abuja, Nigeria: National Bureau of Statistics (Nigeria).                                                                                                                                                                                                  | 9506             |
| Nigeria | 2003      | Nigeria Demographic and Health Survey 2003                                                                | GPS               | Department for International Development (DFiD) (United Kingdom), National Population Commission of Nigeria, ORC Macro, United Nations Children's Fund (UNICEF), United Nations Population Fund (UNFPA). Nigeria Demographic and Health Survey 2003. Calverton, United States: ORC Macro.                                                                                                   | 20567            |
| Nigeria | 2008      | Nigeria Demographic and Health Survey 2008                                                                | GPS               | Macro International, Inc, National Population Commission of Nigeria. Nigeria Demographic and Health Survey 2008. Calverton, United States: Macro International, Inc, 2009.                                                                                                                                                                                                                  | 21433            |
| Nigeria | 2011      | Nigeria Multiple Indicator Cluster Survey 2011                                                            | Admin 1           | National Bureau of Statistics (Nigeria), United Nations Children's Fund (UNICEF). Nigeria Multiple Indicator Cluster Survey 2011. New York, United States: United Nations Children's Fund (UNICEF), 2013.                                                                                                                                                                                   | 76703            |
| Nigeria | 2013      | Nigeria Demographic and Health Survey 2013                                                                | GPS               | ICF International, National Population Commission of Nigeria. Nigeria Demographic and Health Survey 2013. Fairfax, United States: ICF International, 2014.                                                                                                                                                                                                                                  | 77390            |
| Nigeria | 2016-2017 | Nigeria Multiple Indicator Cluster Survey with National Immunization Coverage Survey Supplement 2016-2017 | GPS               | National Agency for the Control of AIDS (Nigeria), National Bureau of Statistics (Nigeria), National Primary Health Care Development Agency (NPHCDA) (Nigeria), United Nations Children's Fund (UNICEF). Nigeria Multiple Indicator Cluster Survey with National Immunization Coverage Survey Supplement 2016-2017. New York, United States: United Nations Children's Fund (UNICEF), 2018. | 218613           |
| Rwanda  | 2000      | Rwanda Demographic and Health Survey 2000                                                                 | Admin 1           | Macro International, Inc, National Office of Population (Rwanda). Rwanda Demographic and Health Survey 2000. Calverton, United States: Macro International, Inc.                                                                                                                                                                                                                            | 20722            |

| Country               | Year(s)   | Name                                                         | Geographic detail | Citation                                                                                                                                                                                                                                                                                                                                                                  | NID <sup>♦</sup> |
|-----------------------|-----------|--------------------------------------------------------------|-------------------|---------------------------------------------------------------------------------------------------------------------------------------------------------------------------------------------------------------------------------------------------------------------------------------------------------------------------------------------------------------------------|------------------|
| Rwanda                | 2000      | Rwanda Multiple Indicator Cluster Survey 2000                | Admin 1           | Department of Statistics (Rwanda), United Nations Children's Fund (UNICEF). Rwanda Multiple Indicator Cluster Survey 2000. New York, United States: United Nations Children's Fund (UNICEF).                                                                                                                                                                              | 26930            |
| Rwanda                | 2005      | Rwanda Demographic and Health Survey 2005                    | GPS               | Macro International, Inc, National Institute of Statistics of Rwanda. Rwanda Demographic and Health Survey 2005. Calverton, United States: Macro International, Inc.                                                                                                                                                                                                      | 20740            |
| Rwanda                | 2010-2011 | Rwanda Demographic and Health Survey 2010-2011               | GPS               | ICF Macro, Ministry of Health (Rwanda), National Institute of Statistics of Rwanda. Rwanda Demographic and Health Survey 2010-2011. Calverton, United States: ICF Macro.                                                                                                                                                                                                  | 56040            |
| Rwanda                | 2014-2015 | Rwanda Demographic and Health Survey 2014-2015               | GPS               | ICF International, Ministry of Health (Rwanda), National Institute of Statistics of Rwanda. Rwanda Demographic and Health Survey 2014-2015. Fairfax, United States: ICF International, 2016.                                                                                                                                                                              | 157063           |
| São Tomé and Príncipe | 2000      | Multiple Indicator Cluster Survey 2000                       | Admin 1           | National Institute of Statistics (), United Nations Children's Fund (UNICEF). São Tomé and Príncipe Multiple Indicator Cluster Survey 2000. New York, United States: United Nations Children's Fund (UNICEF).                                                                                                                                                             | 27055            |
| São Tomé and Príncipe | 2008-2009 | Demographic and Health Survey 2008-2009                      | Admin 2           | ICF Macro, Ministry of Health (), National Institute of Statistics (). Demographic and Health Survey 2008-2009. Calverton, United States: ICF Macro.                                                                                                                                                                                                                      | 26866            |
| São Tomé and Príncipe | 2014      | São Tomé and Príncipe Multiple Indicator Cluster Survey 2014 | Admin 1           | Global Fund to Fight AIDS, Tuberculosis and Malaria (GFATM), ICF International, National Center for Endemic Diseases (CNE) (), National Institute of Statistics (), United Nations Children's Fund (UNICEF), United Nations Development Programme (UNDP). Multiple Indicator Cluster Survey 2014. New York, United States: United Nations Children's Fund (UNICEF), 2016. | 214640           |

| Country  | Year(s)   | Name                                                       | Geographic detail | Citation                                                                                                                                                                                                                                                                              | NID <sup>♦</sup> |
|----------|-----------|------------------------------------------------------------|-------------------|---------------------------------------------------------------------------------------------------------------------------------------------------------------------------------------------------------------------------------------------------------------------------------------|------------------|
| Senegal  | 2005      | Senegal Demographic and Health Survey 2005                 | GPS               | Ministry of Health and Prevention (Senegal), Research Center for Human Development (Senegal). Senegal Demographic and Health Survey 2005. Calverton, United States: Macro International, Inc.                                                                                         | 26855            |
| Senegal  | 2010-2011 | Senegal Demographic and Health Survey 2010-2011            | GPS               | Center for Research in Human Development (CRDH), Cheikh Anta Diop University, Hospital Aristide Le Dantec, ICF Macro, National Agency of Statistics and Demography (Senegal). Senegal Demographic and Health Survey 2010-2011. Calverton, United States: ICF Macro.                   | 56063            |
| Senegal  | 2012-2013 | Senegal Continuous Demographic and Health Survey 2012-2013 | GPS               | ICF International, Ministry of Health and Social Action (Senegal), National Agency of Statistics and Demography (Senegal). Senegal Continuous Demographic and Health Survey 2012-2013. Fairfax, United States: ICF International, 2014.                                               | 111432           |
| Senegal  | 2014      | Senegal Continuous Demographic and Health Survey 2014      | Admin 1           | Cheikh Anta Diop University, ICF International, National Agency of Statistics and Demography (Senegal). Senegal Continuous Demographic and Health Survey 2014. Fairfax, United States: ICF International, 2015.                                                                       | 191270           |
| Senegal  | 2015      | Senegal Continuous Demographic and Health Survey 2015      | GPS               | Cheikh Anta Diop University, ICF International, National Agency of Statistics and Demography (Senegal). Senegal Continuous Demographic and Health Survey 2015. Fairfax, United States: ICF International, 2016.                                                                       | 218592           |
| Senegal  | 2016      | Senegal Continuous Demographic and Health Survey 2016      | GPS               | ICF International, Ministry of Health and Social Action (Senegal), National Agency of Statistics and Demography (Senegal). Senegal Continuous Demographic and Health Survey 2016. Fairfax, United States: ICF International, 2017.                                                    | 286772           |
| Senegal* | 2017      | Senegal Continuous Demographic and Health Survey 2017      | Admin 1           | ICF International, Ministry of Health and Social Action (Senegal), National Agency of Statistics and Demography (Senegal), Unit for the Fight Against Malnutrition (Senegal). Senegal Continuous Demographic and Health Survey 2017. Fairfax, United States: ICF International, 2018. | 353526           |

| Country       | Year(s) | Name                                                | Geographic detail | Citation                                                                                                                                                                                                  | NID <sup>♦</sup> |
|---------------|---------|-----------------------------------------------------|-------------------|-----------------------------------------------------------------------------------------------------------------------------------------------------------------------------------------------------------|------------------|
| Sierra Leone  | 2000    | Sierra Leone Multiple Indicator Cluster Survey 2000 | Admin 1           | Central Statistics Office (Sierra Leone), United Nations Children's Fund (UNICEF). Sierra Leone Multiple Indicator Cluster Survey 2000. New York, United States: United Nations Children's Fund (UNICEF). | 11639            |
| Sierra Leone  | 2005    | Sierra Leone Multiple Indicator Cluster Survey 2005 | Admin 2           | United Nations Children's Fund (UNICEF), Statistics Sierra Leone. Sierra Leone Multiple Indicator Cluster Survey 2005. New York, United States: United Nations Children's Fund (UNICEF).                  | 11649            |
| Sierra Leone  | 2008    | Sierra Leone Demographic and Health Survey 2008     | GPS               | Macro International, Inc, Statistics Sierra Leone. Sierra Leone Demographic and Health Survey 2008. Calverton, United States: Macro International, Inc.                                                   | 21258            |
| Sierra Leone  | 2010    | Sierra Leone Multiple Indicator Cluster Survey 2010 | Admin 2           | Statistics Sierra Leone, United Nations Children's Fund (UNICEF). Sierra Leone Multiple Indicator Cluster Survey 2010. New York, United States: United Nations Children's Fund (UNICEF).                  | 76700            |
| Sierra Leone  | 2013    | Sierra Leone Demographic and Health Survey 2013     | GPS               | ICF International, Ministry of Health and Sanitation (Sierra Leone), Statistics Sierra Leone. Sierra Leone Demographic and Health Survey 2013. Fairfax, United States: ICF International, 2014.           | 131467           |
| Sierra Leone* | 2017    | Sierra Leone Multiple Indicator Cluster Survey 2017 | Admin 2           | Statistics Sierra Leone, United Nations Children's Fund (UNICEF). Sierra Leone Multiple Indicator Cluster Survey 2017. New York, United States: United Nations Children's Fund (UNICEF), 2018.            | 218619           |
| Somalia       | 2006    | Somalia Multiple Indicator Cluster Survey 2006      | Admin 2           | Pan Arab Project for Family Health (PAPFAM), United Nations Children's Fund (UNICEF). Somalia Multiple Indicator Cluster Survey 2006. New York, United States: United Nations Children's Fund (UNICEF).   | 11774            |

| Country       | Year(s) | Name                                                            | Geographic detail | Citation                                                                                                                                                                                                                                                 | NID <sup>♦</sup> |
|---------------|---------|-----------------------------------------------------------------|-------------------|----------------------------------------------------------------------------------------------------------------------------------------------------------------------------------------------------------------------------------------------------------|------------------|
| Somalia       | 2011    | Somalia - Northeast Zone Multiple Indicator Cluster Survey 2011 | GPS               | Puntland Ministry of Planning and International Cooperation (Somalia), United Nations Children's Fund (UNICEF). Somalia - Northeast Zone Multiple Indicator Cluster Survey 2011. New York, United States: United Nations Children's Fund (UNICEF), 2015. | 91508            |
| Somalia       | 2011    | Somalia - Somaliland Multiple Indicator Cluster Survey 2011     | GPS               | Ministry of National Planning and Development (Somaliland), United Nations Children's Fund (UNICEF). Somalia - Somaliland Multiple Indicator Cluster Survey 2011. New York, United States: United Nations Children's Fund (UNICEF), 2015.                | 91507            |
| South Africa  | 1998    | South Africa Demographic and Health Survey 1998                 | Admin 2           | Department of Health (South Africa), Macro International, Inc, South African Medical Research Council. South Africa Demographic and Health Survey 1998. Calverton, United States: Macro International, Inc.                                              | 20796            |
| South Africa* | 2016    | South Africa Demographic and Health Survey 2016                 | GPS               | Department of Health (South Africa), ICF International, South African Medical Research Council, Statistics South Africa. South Africa Demographic and Health Survey 2016. Fairfax, United States: ICF International, 2019.                               | 157064           |
| Sudan         | 1999    | Sudan - South Multiple Indicator Cluster Survey 1999            | Admin 1           | United Nations Children's Fund (UNICEF). South Sudan Multiple Indicator Cluster Survey 1999. New York, United States: United Nations Children's Fund (UNICEF).                                                                                           | 12232            |
| Sudan         | 2000    | Sudan Multiple Indicator Cluster Survey 2000                    | Admin 1           | Central Bureau of Statistics (Sudan), Federal Ministry of Health (Sudan), United Nations Children's Fund (UNICEF). Sudan Multiple Indicator Cluster Survey 2000. New York, United States: United Nations Children's Fund (UNICEF).                       | 12243            |
| Sudan         | 2010    | Sudan - North Multiple Indicator Cluster Survey 2010            | Admin 1           | Central Bureau of Statistics (Sudan), Ministry of Health (South Sudan). Sudan - North Multiple Indicator Cluster Survey 2010. New York, United States: United Nations Children's Fund (UNICEF), 2015.                                                    | 153643           |



| Country              | Year(s)   | Name                                                 | Geographic detail | Citation                                                                                                                                                                                                                                                                                                                      | NID <sup>♦</sup> |
|----------------------|-----------|------------------------------------------------------|-------------------|-------------------------------------------------------------------------------------------------------------------------------------------------------------------------------------------------------------------------------------------------------------------------------------------------------------------------------|------------------|
| Sudan                | 2010      | Sudan - South Multiple Indicator Cluster Survey 2010 | Admin 4           | Central Bureau of Statistics (Sudan), Federal Ministry of Health (Sudan), Government of Sudan, Ministry of Health (South Sudan), Southern Sudan Centre for Census, Statistics and Evaluation. Sudan - South Multiple Indicator Cluster Survey 2010. New York, United States: United Nations Children's Fund (UNICEF), 2015.   | 32189            |
| Sudan                | 2014      | Sudan Multiple Indicator Cluster Survey 2014         | Admin 1           | Central Bureau of Statistics (Sudan), Federal Ministry of Health (Sudan), United Nations Children's Fund (UNICEF). Sudan Multiple Indicator Cluster Survey 2014. New York, United States: United Nations Children's Fund (UNICEF), 2016.                                                                                      | 200617           |
| Swaziland (eSwatini) | 2000      | Swaziland Multiple Indicator Cluster Survey 2000     | Admin 1           | Central Statistical Office (Swaziland), United Nations Children's Fund (UNICEF). Swaziland Multiple Indicator Cluster Survey 2000. New York, United States: United Nations Children's Fund (UNICEF).                                                                                                                          | 12320            |
| Swaziland (eSwatini) | 2006-2007 | Swaziland Demographic and Health Survey 2006-2007    | GPS               | Central Statistical Office (Swaziland), Macro International, Inc. Swaziland Demographic and Health Survey 2006-2007. Calverton, United States: Macro International, Inc.                                                                                                                                                      | 20829            |
| Swaziland (eSwatini) | 2010      | Swaziland Multiple Indicator Cluster Survey 2010     | Admin 1           | Central Statistical Office (Swaziland), United Nations Children's Fund (UNICEF). Swaziland Multiple Indicator Cluster Survey 2010. New York, United States: United Nations Children's Fund (UNICEF).                                                                                                                          | 30325            |
| Swaziland (eSwatini) | 2014      | Swaziland Multiple Indicator Cluster Survey 2014     | Admin 1           | Central Statistical Office (Swaziland), United Nations Children's Fund (UNICEF), United Nations Educational, Scientific and Cultural Organization (UNESCO), United Nations Population Fund (UNFPA). Swaziland Multiple Indicator Cluster Survey 2014. New York, United States: United Nations Children's Fund (UNICEF), 2016. | 200707           |
| Tanzania             | 1999      | Tanzania Demographic and Health Survey 1999          | GPS               | Macro International, Inc, National Bureau of Statistics (Tanzania). Tanzania Demographic and Health Survey 1999. Calverton, United States: Macro International, Inc.                                                                                                                                                          | 20865            |

| Country    | Year(s)   | Name                                               | Geographic detail | Citation                                                                                                                                                                                                                                                                                                                                              | NID <sup>♦</sup> |
|------------|-----------|----------------------------------------------------|-------------------|-------------------------------------------------------------------------------------------------------------------------------------------------------------------------------------------------------------------------------------------------------------------------------------------------------------------------------------------------------|------------------|
| Tanzania   | 2004-2005 | Tanzania Demographic and Health Survey 2004-2005   | Admin 4           | Macro International, Inc, National Bureau of Statistics (Tanzania). Tanzania Demographic and Health Survey 2004-2005. Calverton, United States: Macro International, Inc.                                                                                                                                                                             | 20875            |
| Tanzania   | 2009-2010 | Tanzania Demographic and Health Survey 2009-2010   | GPS               | ICF Macro, National Bureau of Statistics (Tanzania). Tanzania Demographic and Health Survey 2009-2010. Calverton, United States: ICF Macro.                                                                                                                                                                                                           | 21331            |
| Tanzania   | 2015-2016 | Tanzania Demographic and Health Survey 2015-2016   | GPS               | ICF International, Ministry of Health (Zanzibar), Ministry of Health, Community Development, Gender, Elderly and Children (MoHCDEC) (Tanzania), National Bureau of Statistics (Tanzania), Office of Chief Government Statistician (OCGS-Zanzibar). Tanzania Demographic and Health Survey 2015-2016. Fairfax, United States: ICF International, 2016. | 218593           |
| The Gambia | 2000      | Gambia Multiple Indicator Cluster Survey 2000      | Admin 1           | Central Statistics Department (Gambia), United Nations Children's Fund (UNICEF). Gambia Multiple Indicator Cluster Survey 2000. New York, United States: United Nations Children's Fund (UNICEF).                                                                                                                                                     | 3922             |
| The Gambia | 2005-2006 | Gambia Multiple Indicator Cluster Survey 2005-2006 | Admin 2           | Gambia Bureau of Statistics (GBOS), United Nations Children's Fund (UNICEF). Gambia Multiple Indicator Cluster Survey 2005-2006. New York, United States: United Nations Children's Fund (UNICEF).                                                                                                                                                    | 3935             |
| The Gambia | 2010      | Gambia Multiple Indicator Cluster Survey 2010      | Admin 1           | Gambia Bureau of Statistics (GBOS), United Nations Children's Fund (UNICEF). Gambia Multiple Indicator Cluster Survey 2010. New York, United States: United Nations Children's Fund (UNICEF), 2018.                                                                                                                                                   | 91506            |
| The Gambia | 2013      | Gambia Demographic and Health Survey 2013          | Admin 2           | Gambia Bureau of Statistics (GBOS), ICF International, Ministry of Health and Social Welfare (Gambia). Gambia Demographic and Health Survey 2013. Fairfax, United States: ICF International, 2015.                                                                                                                                                    | 77384            |
| Togo       | 1998      | Togo Demographic and Health Survey 1998            | GPS               | Department of Statistics (Togo), Macro International, Inc. Togo Demographic and Health Survey 1998. Calverton, United States: Macro International, Inc.                                                                                                                                                                                               | 20909            |

| Country | Year(s)   | Name                                                | Geographic detail | Citation                                                                                                                                                                                                                                                                   | NID <sup>♦</sup> |
|---------|-----------|-----------------------------------------------------|-------------------|----------------------------------------------------------------------------------------------------------------------------------------------------------------------------------------------------------------------------------------------------------------------------|------------------|
| Togo    | 2000      | Togo Multiple Indicator Cluster Survey 2000         | GPS               | United Nations Children's Fund (UNICEF). Togo Multiple Indicator Cluster Survey 2000. New York, United States: United Nations Children's Fund (UNICEF).                                                                                                                    | 12886            |
| Togo    | 2006      | Togo Multiple Indicator Cluster Survey 2006         | Admin 1           | Directorate General of Statistics and National Accounting (Togo), United Nations Children's Fund (UNICEF). Togo Multiple Indicator Cluster Survey 2006. New York, United States: United Nations Children's Fund (UNICEF).                                                  | 12896            |
| Togo    | 2010      | Togo Multiple Indicator Cluster Survey 2010         | Admin 1           | Directorate General of Statistics and National Accounting (Togo), United Nations Children's Fund (UNICEF). Togo Multiple Indicator Cluster Survey 2010. New York, United States: United Nations Children's Fund (UNICEF).                                                  | 40021            |
| Togo    | 2013-2014 | Togo Demographic and Health Survey 2013-2014        | Admin 1           | Directorate General of Statistics and National Accounts (Togo), ICF International, Ministry of Health (Togo). Togo Demographic and Health Survey 2013-2014. Fairfax, United States: ICF International, 2015.                                                               | 77515            |
| Tunisia | 2011-2012 | Tunisia Multiple Indicator Cluster Survey 2011-2012 | Admin 1           | Ministry of Regional Development and Planning (Tunisia), National Institute of Statistics (Tunisia), United Nations Children's Fund (UNICEF). Tunisia Multiple Indicator Cluster Survey 2011-2012. New York, United States: United Nations Children's Fund (UNICEF), 2014. | 76709            |
| Uganda  | 2000-2001 | Uganda Demographic and Health Survey 2000-2001      | GPS               | Macro International, Inc, Uganda Bureau of Statistics. Uganda Demographic and Health Survey 2000-2001. Calverton, United States: Macro International, Inc.                                                                                                                 | 20993            |
| Uganda  | 2006      | Uganda Demographic and Health Survey 2006           | GPS               | Macro International, Inc, Uganda Bureau of Statistics. Uganda Demographic and Health Survey 2006. Calverton, United States: Macro International, Inc.                                                                                                                      | 21014            |
| Uganda  | 2011      | Uganda Demographic and Health Survey 2011           | GPS               | ICF Macro, Uganda Bureau of Statistics. Uganda Demographic and Health Survey 2011. Fairfax, United States: ICF International.                                                                                                                                              | 56021            |

| Country  | Year(s)   | Name                                                 | Geographic detail | Citation                                                                                                                                                                                                                                                                              | NID <sup>♦</sup> |
|----------|-----------|------------------------------------------------------|-------------------|---------------------------------------------------------------------------------------------------------------------------------------------------------------------------------------------------------------------------------------------------------------------------------------|------------------|
| Uganda   | 2016      | Uganda Demographic and Health Survey 2016            | GPS               | ICF International, Uganda Bureau of Statistics. Uganda Demographic and Health Survey 2016. Fairfax, United States: ICF International, 2018.                                                                                                                                           | 286780           |
| Zambia   | 1999      | Zambia Multiple Indicator Cluster Survey 1999        | Admin 1           | Central Statistical Office (Zambia), Food Security, Health and Nutrition Information System (Zambia), United Nations Children's Fund (UNICEF). Zambia Multiple Indicator Cluster Survey 1999. New York, United States: United Nations Children's Fund (UNICEF).                       | 14122            |
| Zambia   | 2001-2002 | Zambia Demographic and Health Survey 2001-2002       | Admin 1           | Central Board of Health (Zambia), Central Statistical Office (Zambia), Macro International, Inc. Zambia Demographic and Health Survey 2001-2002. Calverton, United States: Macro International, Inc.                                                                                  | 21102            |
| Zambia   | 2002-2003 | Zambia Living Conditions Monitoring Survey 2002-2003 | Admin 2           | Central Statistical Office (Zambia). Zambia Living Conditions Monitoring Survey 2002-2003. Lusaka, Zambia: Central Statistical Office (Zambia).                                                                                                                                       | 14027            |
| Zambia   | 2007      | Zambia Demographic and Health Survey 2007            | GPS               | Central Statistical Office (Zambia), Macro International, Inc. Zambia Demographic and Health Survey 2007. Calverton, United States: Macro International, Inc.                                                                                                                         | 21117            |
| Zambia   | 2010      | Zambia Living Conditions Monitoring Survey 2010      | Admin 2           | Central Statistical Office (Zambia). Zambia Living Conditions Monitoring Survey 2010.                                                                                                                                                                                                 | 58660†           |
| Zambia   | 2013-2014 | Zambia Demographic and Health Survey 2013-2014       | GPS               | Central Statistical Office (Zambia), ICF International, Ministry of Health (Zambia), Tropical Diseases Research Centre, University Teaching Hospital (Zambia), University of Zambia. Zambia Demographic and Health Survey 2013-2014. Fairfax, United States: ICF International, 2015. | 77516            |
| Zimbabwe | 1999      | Zimbabwe Demographic and Health Survey 1999          | GPS               | Central Statistical Office (Zimbabwe), Macro International, Inc. Zimbabwe Demographic and Health Survey 1999. Calverton, United States: Macro International, Inc.                                                                                                                     | 21151            |

| Country  | Year(s)   | Name                                               | Geographic detail | Citation                                                                                                                                                                                                                                     | NID <sup>♦</sup> |
|----------|-----------|----------------------------------------------------|-------------------|----------------------------------------------------------------------------------------------------------------------------------------------------------------------------------------------------------------------------------------------|------------------|
| Zimbabwe | 2005-2006 | Zimbabwe Demographic and Health Survey 2005-2006   | GPS               | Central Statistical Office (Zimbabwe), Macro International, Inc. Zimbabwe Demographic and Health Survey 2005-2006. Calverton, United States: Macro International, Inc.                                                                       | 21163            |
| Zimbabwe | 2009      | Zimbabwe Multiple Indicator Monitoring Survey 2009 | Admin 1           | Central Statistical Office (Zimbabwe). Zimbabwe Multiple Indicator Monitoring Survey 2009. New York, United States: United Nations Children's Fund (UNICEF).                                                                                 | 35493            |
| Zimbabwe | 2010-2011 | Zimbabwe Demographic and Health Survey 2010-2011   | GPS               | ICF Macro, Zimbabwe National Statistics Agency. Zimbabwe Demographic and Health Survey 2010-2011. Calverton, United States: ICF Macro, 2012.                                                                                                 | 55992            |
| Zimbabwe | 2014      | Zimbabwe Multiple Indicator Cluster Survey 2014    | Admin 1           | United Nations Children's Fund (UNICEF), Zimbabwe National Statistics Agency. Zimbabwe Multiple Indicator Cluster Survey 2014. New York, United States: United Nations Children's Fund (UNICEF), 2015.                                       | 152720           |
| Zimbabwe | 2015      | Zimbabwe Demographic and Health Survey 2015        | GPS               | ICF International, National Microbiology Reference Laboratory, Harare Central Hospital (NMRL) (Zimbabwe), Zimbabwe National Statistics Agency. Zimbabwe Demographic and Health Survey 2015. Fairfax, United States: ICF International, 2016. | 157066           |

♦NID = Data source unique identifier in the Global Health Data Exchange (GHDx) (<http://ghdx.healthdata.org/>). Additional information about each data source is available via the GHDx, including information about the data provider and links to where the data can be accessed or requested (where available). NIDs can be entered in the search bar to retrieve the record for a particular source.

\*Since the publication of GBD 2017, additional surveys (South Africa DHS 2016, Senegal DHS 2017 and Sierra Leone MICS 2017) have been released, and we incorporated these into the country-level estimates to which we calibrate our models.

†Data source is not publicly available due to restrictions by the data provider and was used under license for the current study.

All data sources included in this study are cited unless prohibited by original data holder.

**Supplementary Table 3. Household survey reports used in mapping exclusive breastfeeding among infants under 6 months**

| Country                | Year(s) | Name                                                                                         | Geographic detail | Citation                                                                                                                                                                                                                                                                                   | NID <sup>♦</sup> |
|------------------------|---------|----------------------------------------------------------------------------------------------|-------------------|--------------------------------------------------------------------------------------------------------------------------------------------------------------------------------------------------------------------------------------------------------------------------------------------|------------------|
| Algeria*               | 2006    | Algeria Multiple Indicator Cluster Survey 2006                                               | Admin 0.5**       | Joint United Nations Program on HIV/AIDS (UNAIDS), Ministry of Health, Population and Hospital Reform (Algeria), National Office of Statistics (Algeria), United Nations Children’s Fund (UNICEF), United Nations Population Fund (UNFPA). Algeria Multiple Indicator Cluster Survey 2006. | 641              |
| Burkina Faso*          | 2012    | Burkina Faso National Nutrition Survey 2012                                                  | Admin 2           | Ministry of Health (Burkina Faso), National Institute of Statistics and Demography (Burkina Faso). Burkina Faso National Nutrition Survey 2012.                                                                                                                                            | 262834           |
| Burkina Faso*          | 2016    | Burkina Faso National Nutrition Survey 2016                                                  | Admin 1           | Ministry of Health (Burkina Faso), National Institute of Statistics and Demography (Burkina Faso). Burkina Faso National Nutrition Survey 2016.                                                                                                                                            | 299307           |
| Mali*                  | 2016    | Mali National Anthropometric Nutrition Survey and Mortality Retrospective June – August 2016 | Admin 3           | Government of Mali, National Institute of Statistics (INSTAT) (Mali). Mali National Anthropometric Nutrition Survey and Mortality Retrospective June - August 2016.                                                                                                                        | 297069           |
| Niger*                 | 2009    | Niger Nutrition and Child Survival Survey                                                    | Admin 1           | Ministry of Public Health (Niger), National Institute of Statistics (Niger). Niger Nutrition and Child Survival Survey 2009.                                                                                                                                                               | 160053           |
| São Tomé and Príncipe* | 2006    | São Tomé and Príncipe Multiple Indicator Cluster Survey 2006                                 | Admin 2           | National Institute of Statistics (São Tomé and Príncipe), United Nations Children’s Fund (UNICEF). São Tomé and Príncipe Multiple Indicator Cluster Survey 2006. New York, United States: United Nations Children’s Fund (UNICEF).                                                         | 11434            |

| Country  | Year(s) | Name                                                          | Geographic detail | Citation                                                                                                                                                                                                                                                                                                                                                                                                                     | NID <sup>♦</sup> |
|----------|---------|---------------------------------------------------------------|-------------------|------------------------------------------------------------------------------------------------------------------------------------------------------------------------------------------------------------------------------------------------------------------------------------------------------------------------------------------------------------------------------------------------------------------------------|------------------|
| Somalia* | 2009    | Somalia National Micronutrient and Anthropometric Survey 2009 | Admin 0.5**       | Centre for International Health and Development, Institute of Child Health (CIHD), Food and Nutrition Security Analysis Unit (Somalia), Ministry of Health (Somalia), Ministry of Health and Labor (Somaliland), Puntland Ministry of Health (Somalia), United Nations Children’s Fund (UNICEF), World Food Programme (WFP), World Health Organization (WHO). Somalia National Micronutrient and Anthropometric Survey 2009. | 152968           |

♦NID = Data source unique identifier in the Global Health Data Exchange (GHDx) (<http://ghdx.healthdata.org/>). Additional information about each data source is available via the GHDx, including information about the data provider and links to where the data can be accessed or requested (where available). NIDs can be entered in the search bar to retrieve the record for a particular source.

\*Since the publication of GBD 2017, additional survey reports were incorporated into the country-level estimates to which we calibrate our models.

\*\*Admin 0.5 refers to subnational data at a lower resolution than Admin 1.

**Supplementary Table 4. Data excluded from both the geostatistical model and GBD estimates**

| Country  | Series                                              | Year(s)   | Citation                                                                                                                                                                                                                                        | NID <sup>♦</sup> | Rationale for exclusion                                                                                                                        |
|----------|-----------------------------------------------------|-----------|-------------------------------------------------------------------------------------------------------------------------------------------------------------------------------------------------------------------------------------------------|------------------|------------------------------------------------------------------------------------------------------------------------------------------------|
| Mali     | Multiple Indicator Cluster Survey (MICS)            | 2009-2010 | Ministry of Health (Mali), National Institute of Statistics (INSTAT) (Mali), United Nations Children's Fund (UNICEF). Mali Multiple Indicator Cluster Survey 2009-2010. New York, United States: United Nations Children's Fund (UNICEF), 2017. | 270627           | Survey estimates are systematically low compared to estimates from other established survey series (2006 DHS, 2012 DHS)                        |
| Mali     | LSMS                                                | 2014-2015 | Ministry of Rural Development (Mali), National Institute of Statistics (INSTAT) (Mali), World Bank. Mali Agricultural Integrated Economic Survey 2014-2015. Washington DC, United States: World Bank.                                           | 260407           | Survey estimates are implausibly high compared to estimates from other established survey series (2012 DHS)                                    |
| Nigeria  | Core Welfare Indicators Questionnaire Survey (CWIQ) | 2006-2007 | National Bureau of Statistics (Nigeria). Nigeria Core Welfare Indicators Questionnaire Survey 2006. Abuja, Nigeria: National Bureau of Statistics (Nigeria).                                                                                    | 9522             | Survey estimates are systematically high compared to admin estimates and estimates from other established survey series (2008 DHS, 2007 MICS). |
| Zambia   | LSMS                                                | 1998      | Central Statistical Office (Zambia), London School of Hygiene and Tropical Medicine. Zambia Living Conditions Monitoring Survey 1998. Lusaka, Zambia: Central Statistical Office (Zambia).                                                      | 14015            | Estimates considered implausible (zero values).                                                                                                |
| Zambia   | Zambia Living Conditions Monitoring Survey          | 2002-2003 | Central Statistical Office (Zambia). Zambia Living Conditions Monitoring Survey 2002-2003. Lusaka, Zambia: Central Statistical Office (Zambia).                                                                                                 | 14027            | Estimates considered implausible (zero values).                                                                                                |
| Ethiopia | LSMS                                                | 2015-2016 | Central Statistical Agency (Ethiopia), World Bank. Ethiopia Socioeconomic Survey 2015-2016. Washington DC, United States: World Bank, 2015.                                                                                                     | 286657           | Estimates considered implausible (zero values).                                                                                                |
| Senegal  | Multiple Indicator Cluster Survey (MICS)            | 2015-2016 | National Agency of Statistics and Demography (Senegal), United Nations Children's Fund (UNICEF). Senegal - Dakar Urban Multiple Indicator Cluster Survey 2015-2016. New York, United States: United Nations Children's Fund (UNICEF), 2018.     | 287639           | Estimates considered implausible (zero values).                                                                                                |



| Country | Series | Year(s)   | Citation                                                                                                                                                        | NID <sup>♦</sup> | Rationale for exclusion                                                                                                            |
|---------|--------|-----------|-----------------------------------------------------------------------------------------------------------------------------------------------------------------|------------------|------------------------------------------------------------------------------------------------------------------------------------|
| Uganda  | LSMS   | 2010-2011 | Uganda Bureau of Statistics. Uganda Living Standards Measurement Survey - Integrated Survey on Agriculture 2010-2011. Washington DC, United States: World Bank. | 142934           | Survey estimates are systematically high compared to estimates from other established survey series (2006 DHS, 2011 DHS, 2016 DHS) |
| Uganda  | LSMS   | 2011-2012 | Uganda Bureau of Statistics. Uganda Living Standards Measurement Survey - Integrated Survey on Agriculture 2010-2011. Washington DC, United States: World Bank. | 142935           | Survey estimates are systematically high compared to estimates from other established survey series (2006 DHS, 2011 DHS, 2016 DHS) |

<sup>♦</sup>NID = Data source unique identifier in the Global Health Data Exchange (GHDx) (<http://ghdx.healthdata.org/>). Additional information about each data source is available via the GHDx, including information about the data provider and links to where the data can be accessed or requested (where available). NIDs can be entered in the search bar to retrieve the record for a particular source.

**Supplementary Table 5. Data excluded from GBD estimates but included in geostatistical model**

| Country    | Series                                   | Year(s) | Citation                                                                                                                                                                                                                   | NID <sup>♦</sup> | Rationale for exclusion                                              |
|------------|------------------------------------------|---------|----------------------------------------------------------------------------------------------------------------------------------------------------------------------------------------------------------------------------|------------------|----------------------------------------------------------------------|
| Madagascar | Multiple Indicator Cluster Survey (MICS) | 2012    | National Institute of Statistics (Madagascar), United Nations Children's Fund (UNICEF). Madagascar - South Multiple Indicator Cluster Survey 2012. New York, United States: United Nations Children's Fund (UNICEF), 2015. | 125594           | Not nationally representative. Only sampled the south of Madagascar. |

<sup>♦</sup>NID = Data source unique identifier in the Global Health Data Exchange (GHDx) (<http://ghdx.healthdata.org/>). Additional information about each data source is available via the GHDx, including information about the data provider and links to where the data can be accessed or requested (where available). NIDs can be entered in the search bar to retrieve the record for a particular source.

5 **Supplementary Table 6. Data excluded from geostatistical model but included in GBD estimates**

| Country       | Series                                                                | Year(s)   | Citation                                                                                                                                                                                                                                        | NID <sup>♦</sup> | Rationale for exclusion                         |
|---------------|-----------------------------------------------------------------------|-----------|-------------------------------------------------------------------------------------------------------------------------------------------------------------------------------------------------------------------------------------------------|------------------|-------------------------------------------------|
| Guinea-Bissau | Multiple Indicator Cluster Survey (MICS)                              | 2000      | Ministry of Health (Mali), National Institute of Statistics (INSTAT) (Mali), United Nations Children's Fund (UNICEF). Mali Multiple Indicator Cluster Survey 2009-2010. New York, United States: United Nations Children's Fund (UNICEF), 2017. | 4808             | Estimates considered implausible (zero values). |
| Kenya         | Kenya - North Eastern Province Multiple Indicator Cluster Survey 2007 | 2007      | Kenya National Bureau of Statistics, United Nations Children's Fund (UNICEF). Kenya - North Eastern Province Multiple Indicator Cluster Survey 2007. Nairobi, Kenya: Kenya National Bureau of Statistics.                                       | 155335           | Estimates considered implausible (zero values). |
| Zambia        | Zambia Living Conditions Monitoring Survey                            | 2004-2005 | Central Statistical Office (Zambia). Zambia Living Conditions Monitoring Survey 2004-2005. Lusaka, Zambia: Central Statistical Office (Zambia).                                                                                                 | 14063            | Estimates considered implausible (zero values). |

<sup>♦</sup>NID = Data source unique identifier in the Global Health Data Exchange (GHDx) (<http://ghdx.healthdata.org/>). Additional information about each data source is available via the GHDx, including information about the data provider and links to where the data can be accessed or requested (where available). NIDs can be entered in the search bar to retrieve the record for a particular source.

**Supplementary Table 7. Sources for covariates used in mapping.**

| Covariate                                             | Temporal resolution | Source                                                                                           | Reference                                                                                                                                                                                                                                                                                                                                  | Supporting Rationale                                                                                                                                                                                                                                                                                                                                                                                                                                                 |
|-------------------------------------------------------|---------------------|--------------------------------------------------------------------------------------------------|--------------------------------------------------------------------------------------------------------------------------------------------------------------------------------------------------------------------------------------------------------------------------------------------------------------------------------------------|----------------------------------------------------------------------------------------------------------------------------------------------------------------------------------------------------------------------------------------------------------------------------------------------------------------------------------------------------------------------------------------------------------------------------------------------------------------------|
| Urbanicity                                            | Annual, 2000–2016   | European Commission/ GHS                                                                         | Pesaresi, M. <i>et al.</i> Operating procedure for the production of the Global Human Settlement Layer from Landsat data of the epochs 1975, 1990, 2000, and 2014. JRC Technical Report EUR 27741 EN; doi: 10.2788/253582 (online) (Publications Office of the European Union, 2016).                                                      | <i>These covariates were included as measures or proxies for connectedness and urbanicity, as EBF is typically found to be different in urban areas compared to rural locations.</i><br><br>UNICEF. Exclusive breastfeeding (<6 months) dataset. Infant and young child feeding (IYCF) data. Available at: <a href="https://data.unicef.org/resources/dataset/infant-young-child-feeding/">https://data.unicef.org/resources/dataset/infant-young-child-feeding/</a> |
| Night-time lights                                     | Annual, 2000–2013   | NOAA DMSP                                                                                        | Savory, P. <i>et al.</i> Intercalibration and Gaussian Process Modeling of Nighttime Lights Imagery for Measuring Urbanization Trends in Africa 2000–2013. <i>Remote Sensing</i> <b>9</b> , (2017).                                                                                                                                        | Global Nutrition Report. 2018 Global Nutrition Report: Shining a light to spur action on nutrition. (Development Initiatives Poverty Research Ltd., 2018)<br><br>Shirima, R., Greiner, T., Kylberg, E. & Gebre-Medhin, M. Exclusive breastfeeding is rarely practised in rural and urban Morogoro, Tanzania. <i>Public Health Nutrition</i> <b>4</b> , 147–154 (2001).                                                                                               |
| Travel time to nearest settlement >50,000 inhabitants | Static              | Malaria Atlas Project, Big Data Institute, Nuffield Department of Medicine, University of Oxford | Weiss, D. J. <i>et al.</i> A global map of travel time to cities to assess inequalities in accessibility in 2015. <i>Nature</i> <b>533</b> , 333–336 (2018).                                                                                                                                                                               | Shirima, R., Gebre-Medhin, M. & Greiner, T. Information and socioeconomic factors associated with early breastfeeding practices in rural and urban Morogoro, Tanzania. <i>Acta Paediatrica</i> <b>90</b> , 936–942 (2001).                                                                                                                                                                                                                                           |
| Population                                            | Annual, 2000–2017   | WorldPop                                                                                         | Lloyd, C. T., Sorichetta, A. & Tatem, A. J. High resolution global gridded data for use in population studies. <i>Scientific Data</i> <b>4</b> , sdata20171 (2017).<br><br>World Pop. Get data. Available at: <a href="http://www.worldpop.org.uk/data/get_data/">http://www.worldpop.org.uk/data/get_data/</a> (Accessed: 24th July 2017) | Perez-Escamilla, R. Update on the breastfeeding situation in Africa. <i>Nutrition Research</i> <b>13</b> , 597–609 (1993).<br><br><i>Population data:</i><br>Tatem, A.J. WorldPop, open data for spatial demography. <i>Scientific Data</i> <b>4</b> , 170004 (2017).                                                                                                                                                                                                |

| Covariate                                                             | Temporal resolution | Source                                                                       | Reference                                                                                                                                                                       | Supporting Rationale                                                                                                                                                                                                                                                                                                                                                                                                                                             |
|-----------------------------------------------------------------------|---------------------|------------------------------------------------------------------------------|---------------------------------------------------------------------------------------------------------------------------------------------------------------------------------|------------------------------------------------------------------------------------------------------------------------------------------------------------------------------------------------------------------------------------------------------------------------------------------------------------------------------------------------------------------------------------------------------------------------------------------------------------------|
| Human Development Index                                               | Annual, 2000–2016   | Kummu <i>et al.</i> (modelled)                                               | Kummu, M. <i>et al.</i> Gridded global datasets for Gross Domestic Product and Human Development Index over 1990–2015. <i>Scientific Data</i> , <b>5</b> :180004 (2018)         | Victora, C. G. <i>et al.</i> Breastfeeding in the 21st century: epidemiology, mechanisms, and lifelong effect. <i>The Lancet</i> <b>387</b> , 475–490 (2016).                                                                                                                                                                                                                                                                                                    |
| Educational attainment in women of reproductive age (15–49 years old) | Annual, 2000–2017   | Institute for Health Metrics and Evaluation (IHME), University of Washington | Graetz, N. <i>et al.</i> Local variation in educational attainment in low- and middle-income countries, 2000–2017. <i>In review.</i>                                            | Coutinho, S. B., de Lira, P.I.C., de Carvalho Lima, M. & Ashworth, A. Comparison of the effect of two systems for the promotion of exclusive breastfeeding. <i>The Lancet</i> <b>366</b> , 1094–1100 (2005).<br><br>Cernadas, J. M. C., Noceda, G., Barrera, L., Martinez, A. M. & Garsd, A. Maternal and Perinatal Factors Influencing the Duration of Exclusive Breastfeeding During the First 6 Months of Life. <i>J Hum Lact</i> <b>19</b> , 136–144 (2003). |
| Nutritional yield for vitamin A                                       | Static              | Herrero <i>et al.</i> (modelled)                                             | Herrero, M. <i>et al.</i> Farming and the geography of nutrient production for human use: a transdisciplinary analysis. <i>Lancet Planet. Health</i> <b>1</b> , e33–e42 (2017). | Lartey, A. Maternal and child nutrition in Sub-Saharan Africa: challenges and interventions. <i>Proceedings of the Nutrition Society</i> <b>67</b> , 105–108 (2008).<br><br>Wray, J. D. Maternal Nutrition, Breast-Feeding and Infant Survival. in <i>Nutrition and Human Reproduction</i> (ed. Mosley, W. H.) 197–229 (Springer US, 1978). doi:10.1007/978-1-4684-0790-7_12                                                                                     |
| Human Immunodeficiency Virus (HIV)                                    | Annual, 2000–2017   | IHME, University of Washington                                               | Dwyer-Lindgren, L. <i>et al.</i> Mapping HIV prevalence in sub-Saharan Africa between 2000 and 2017. <i>Nature</i> (2019)                                                       | Bland, R. M. <i>et al.</i> Intervention to promote exclusive breastfeeding for the first 6 months of life in a high HIV prevalence area. <i>AIDS</i> <b>22</b> , 883 (2008).<br><br>Doherty, T. <i>et al.</i> Effectiveness of the WHO/UNICEF guidelines on infant feeding for HIV-positive women: results from a prospective cohort study in South Africa. <i>AIDS</i> <b>21</b> , 1791 (2007).                                                                 |

| Covariate | Temporal resolution | Source | Reference | Supporting Rationale                                                                                                                                                                                                                                                                                                                                                                                                                                                                  |
|-----------|---------------------|--------|-----------|---------------------------------------------------------------------------------------------------------------------------------------------------------------------------------------------------------------------------------------------------------------------------------------------------------------------------------------------------------------------------------------------------------------------------------------------------------------------------------------|
|           |                     |        |           | <p>Thairu, L. N., Pelto, G. H., Rollins, N. C., Bland, R. M. &amp; Ntshangase, N. Sociocultural influences on infant feeding decisions among HIV-infected women in rural Kwa-Zulu Natal, South Africa. <i>Maternal &amp; Child Nutrition</i> <b>1</b>, 2–10 (2005).</p> <p>Bland, R. M., Rollins, N. C., Coutsoydis, A. &amp; Coovadia, H. M. Breastfeeding practices in an area of high HIV prevalence in rural South Africa. <i>Acta Paediatrica</i> <b>91</b>, 704–711 (2002).</p> |

10 **Supplementary Table 8. Fitted model parameters**

| Parameter                   | North Africa      |                  |                    | Central sub-Saharan Africa |                  |                    | Eastern sub-Saharan Africa |                  |                    | Western sub-Saharan Africa |                  |                    | Southern sub-Saharan Africa |                  |                    |
|-----------------------------|-------------------|------------------|--------------------|----------------------------|------------------|--------------------|----------------------------|------------------|--------------------|----------------------------|------------------|--------------------|-----------------------------|------------------|--------------------|
|                             | 2.5 <sup>th</sup> | 50 <sup>th</sup> | 97.5 <sup>th</sup> | 2.5 <sup>th</sup>          | 50 <sup>th</sup> | 97.5 <sup>th</sup> | 2.5 <sup>th</sup>          | 50 <sup>th</sup> | 97.5 <sup>th</sup> | 2.5 <sup>th</sup>          | 50 <sup>th</sup> | 97.5 <sup>th</sup> | 2.5 <sup>th</sup>           | 50 <sup>th</sup> | 97.5 <sup>th</sup> |
| $\beta_0$                   | -0.1462           | -0.0415          | 0.0629             | -0.5129                    | -0.2069          | 0.0988             | -0.6069                    | -0.3637          | -0.1267            | -0.4200                    | -0.1388          | 0.1421             | -0.3082                     | -0.0069          | 0.2939             |
| $\beta_1$ (GAM)             | -0.0883           | 0.0160           | 0.1208             | 0.0646                     | 0.1977           | 0.3192             | -0.1143                    | -0.0013          | 0.1109             | -0.4187                    | -0.2344          | -0.0502            | -0.0929                     | 0.1263           | 0.3500             |
| $\beta_1$ (BRT)             | 0.9300            | 0.1006           | 1.0827             | 0.4819                     | 0.5662           | 0.6506             | 0.5230                     | 0.5843           | 0.6456             | 0.4150                     | 0.4709           | 0.5269             | 0.4513                      | 0.5956           | 0.7405             |
| $\beta_1$ (Lasso)           | -0.1224           | -0.0224          | 0.0768             | 0.1090                     | 0.2356           | 0.3642             | 0.2888                     | 0.4168           | 0.5357             | 0.5725                     | 0.7634           | 0.9541             | 0.0282                      | 0.2771           | 0.5223             |
| Nominal range               | 2.7376            | 5.8356           | 12.0506            | 3.6090                     | 4.7328           | 6.5772             | 4.3078                     | 5.4416           | 6.6638             | 2.8637                     | 3.4191           | 3.9838             | 2.9145                      | 5.7189           | 10.5247            |
| Nominal variance            | 0.0090            | 0.0290           | 0.0833             | 0.2809                     | 0.3879           | 0.5591             | 0.2882                     | 0.3870           | 0.5379             | 0.4892                     | 0.6213           | 0.7569             | 0.0651                      | 0.1564           | 0.3451             |
| Precision for $\gamma_{ci}$ | 1574.64           | 14527.76         | 75595.18           | 1.8815                     | 5.8201           | 20.3750            | 4.7134                     | 12.6720          | 36.4112            | 1.2403                     | 2.9760           | 5.7166             | 3.6622                      | 15.2776          | 104.7565           |
| Precision for $\epsilon_i$  | 2089.64           | 16121.34         | 83742.48           | 1213.19                    | 14355.96         | 70737.40           | 1438.27                    | 14449.73         | 71913.64           | 1990.83                    | 15633.41         | 178313.84          | 1323.07                     | 12958.36         | 66808.70           |
| AR1 $\rho$                  | 0.8702            | 0.9795           | 0.997              | 0.8684                     | 0.9308           | 0.9748             | 0.8836                     | 0.9211           | 0.9501             | 0.6906                     | 0.7530           | 0.7953             | 0.7639                      | 0.9149           | 0.9723             |

For each modeling region, the following parameters are reported: intercept ( $\beta_0$ ), regression coefficients ( $\beta_1$ ) corresponding to the three sub-models (generalised additive model (GAM), boosted-regression trees (BRT), and Lasso), nominal range, nominal variance, precision for country-level random effects ( $\gamma_{ci}$ ), precision for independent and identically distributed nugget (uncorrelated error term) effect ( $\epsilon_i$ ), and hyperparameter ( $\rho$ ) for the temporal first-order autoregressive (AR1) covariance function at 2.5<sup>th</sup>, 50<sup>th</sup> and 97.5<sup>th</sup> quantiles.

**Supplementary Table 9. In-sample and out-of-sample validation metrics from the covariate sensitivity analysis by level of aggregation.**

15

| Model                                                                                                                                                                                                                                                                                                                    | Metric              | Country Level |         | First Administrative Level |         | Second Administrative Level |         |
|--------------------------------------------------------------------------------------------------------------------------------------------------------------------------------------------------------------------------------------------------------------------------------------------------------------------------|---------------------|---------------|---------|----------------------------|---------|-----------------------------|---------|
|                                                                                                                                                                                                                                                                                                                          |                     | IS            | OOS     | IS                         | OOS     | IS                          | OOS     |
| <b>Covariate Sensitivity Analysis</b>                                                                                                                                                                                                                                                                                    |                     |               |         |                            |         |                             |         |
| <b>Model 1:<br/>Raw<br/>covariates</b>                                                                                                                                                                                                                                                                                   | <b>ME</b>           | -0.0139       | 0.2407  | -0.0139                    | 0.2407  | -0.0139                     | 0.2407  |
|                                                                                                                                                                                                                                                                                                                          | <b>RMSE</b>         | 7.3665        | 13.5072 | 13.1176                    | 17.4058 | 17.7537                     | 21.1484 |
|                                                                                                                                                                                                                                                                                                                          | <b>Coverage (%)</b> | 88.6509       | 84.3821 | 88.6509                    | 84.3621 | 88.6509                     | 84.3621 |
| <b>Model 2:<br/>Stacking<br/>predictions<br/>as covariates</b>                                                                                                                                                                                                                                                           | <b>ME</b>           | -0.4875       | -0.0506 | -0.4875                    | -0.0506 | -0.4875                     | -0.0506 |
|                                                                                                                                                                                                                                                                                                                          | <b>RMSE</b>         | 1.8526        | 14.9421 | 7.4135                     | 18.6234 | 12.2126                     | 22.3088 |
|                                                                                                                                                                                                                                                                                                                          | <b>Coverage (%)</b> | 95.8904       | 79.2453 | 95.8904                    | 79.2453 | 95.8904                     | 79.2453 |
| <b>Model 3:<br/>Gaussian<br/>Process (GP)</b>                                                                                                                                                                                                                                                                            | <b>ME</b>           | -0.4875       | -0.0506 | -0.4875                    | -0.0506 | -0.4875                     | -0.0506 |
|                                                                                                                                                                                                                                                                                                                          | <b>RMSE</b>         | 1.8526        | 14.9421 | 7.4135                     | 18.6234 | 12.2126                     | 22.3089 |
|                                                                                                                                                                                                                                                                                                                          | <b>Coverage (%)</b> | 95.8904       | 79.2453 | 95.8904                    | 79.2453 | 95.8904                     | 79.2453 |
| <b>Model 4:<br/>Raw<br/>covariates +<br/>GP</b>                                                                                                                                                                                                                                                                          | <b>ME</b>           | -0.0139       | 0.1267  | -0.0139                    | 0.1267  | -0.0139                     | 0.1267  |
|                                                                                                                                                                                                                                                                                                                          | <b>RMSE</b>         | 0.9994        | 14.1258 | 6.2024                     | 17.6270 | 12.5794                     | 21.2935 |
|                                                                                                                                                                                                                                                                                                                          | <b>Coverage (%)</b> | 97.5589       | 91.4886 | 97.5589                    | 91.4886 | 97.5589                     | 91.4886 |
| <b>*Model 5:<br/>Stacking<br/>covariates +<br/>GP</b>                                                                                                                                                                                                                                                                    | <b>ME</b>           | -0.3696       | 0.4233  | -0.3696                    | 0.4233  | -0.3696                     | 0.4233  |
|                                                                                                                                                                                                                                                                                                                          | <b>RMSE</b>         | 1.4044        | 12.9001 | 5.6345                     | 16.5685 | 11.4187                     | 20.4707 |
|                                                                                                                                                                                                                                                                                                                          | <b>Coverage (%)</b> | 97.5889       | 87.6537 | 97.5889                    | 87.6537 | 97.5889                     | 87.6537 |
| <b>24-hour recall period Sensitivity Analysis</b>                                                                                                                                                                                                                                                                        |                     |               |         |                            |         |                             |         |
| <b>Only<br/>surveys with<br/>24-hour<br/>recall period</b>                                                                                                                                                                                                                                                               | <b>ME</b>           | -0.3306       | 1.0198  | -0.3306                    | 1.0198  | -0.3306                     | 1.0198  |
|                                                                                                                                                                                                                                                                                                                          | <b>RMSE</b>         | 1.2691        | 13.2002 | 5.5748                     | 16.7282 | 11.4241                     | 20.6138 |
|                                                                                                                                                                                                                                                                                                                          | <b>Coverage (%)</b> | 97.9263       | 87.1779 | 97.9263                    | 87.1779 | 97.9263                     | 87.1779 |
| <b>*All<br/>available<br/>surveys</b>                                                                                                                                                                                                                                                                                    | <b>ME</b>           | -0.3696       | 0.4233  | -0.3696                    | 0.4233  | -0.3696                     | 0.4233  |
|                                                                                                                                                                                                                                                                                                                          | <b>RMSE</b>         | 1.4044        | 12.9001 | 5.6345                     | 16.5685 | 11.4187                     | 20.4707 |
|                                                                                                                                                                                                                                                                                                                          | <b>Coverage (%)</b> | 97.5889       | 87.6537 | 97.5889                    | 87.6537 | 97.5889                     | 87.6537 |
| <p>For each model configuration, the following metrics are reported: mean error (ME (percentage points)), root-mean-square error (RMSE (percentage points)), and 95% prediction interval coverage (“coverage” (%)).</p> <p>*These models were chosen as our final models based on results from sensitivity analyses.</p> |                     |               |         |                            |         |                             |         |

20

25

**Supplementary Table 10. List of surveys used in the geostatistical model that are not nationally representative**

| Country    | Series                                   | Year(s)   | Citation                                                                                                                                                                                                                                                      | NID*   | Subnational region                                                            |
|------------|------------------------------------------|-----------|---------------------------------------------------------------------------------------------------------------------------------------------------------------------------------------------------------------------------------------------------------------|--------|-------------------------------------------------------------------------------|
| Madagascar | Multiple Indicator Cluster Survey (MICS) | 2012      | National Institute of Statistics (Madagascar), United Nations Children's Fund (UNICEF). Madagascar - South Multiple Indicator Cluster Survey 2012. New York, United States: United Nations Children's Fund (UNICEF), 2015.                                    | 125594 | Only sampled the south of Madagascar.                                         |
| Egypt      | Multiple Indicator Cluster Survey (MICS) | 2013-2014 | El-Zanaty and Associates, Ministry of Health and Population (Egypt), United Nations Children's Fund (UNICEF). Egypt IPHN Rural Districts Multiple Indicator Cluster Survey 2013-2014. New York, United States: United Nations Children's Fund (UNICEF), 2016. | 159617 | Only sampled selected disadvantaged rural districts in Upper and Lower Egypt. |
| Ghana      | Multiple Indicator Cluster Survey (MICS) | 2010-2011 | Institute of Statistical, Social and Economic Research, University of Ghana, United Nations Children's Fund (UNICEF). Ghana - Accra Multiple Indicator Cluster Survey 2010-2011. New York, United States: United Nations Children's Fund (UNICEF), 2014.      | 56241  | Only sampled 5 highly densely populated localities in Ghana.                  |
| Kenya      | Multiple Indicator Cluster Survey (MICS) | 2008      | Kenya National Bureau of Statistics, United Nations Children's Fund (UNICEF). Kenya - Eastern Province Multiple Indicator Cluster Survey 2008. Nairobi, Kenya: Kenya National Bureau of Statistics.                                                           | 7401   | Only sampled Eastern Province in Kenya.                                       |
| Kenya      | Multiple Indicator Cluster Survey (MICS) | 2009      | Kenya National Bureau of Statistics, United Nations Children's Fund (UNICEF). Kenya - Coast Multiple Indicator Cluster Survey 2009. New York, United States: United Nations Children's Fund (UNICEF), 2014.                                                   | 56420  | Only sampled Mombasa district's informal settlements in Kenya.                |
| Kenya      | Multiple Indicator Cluster Survey (MICS) | 2011      | Kenya National Bureau of Statistics, United Nations Children's Fund (UNICEF). Kenya - Nyanza Province Multiple Indicator Cluster Survey 2011. Nairobi, Kenya: Kenya National Bureau of Statistics.                                                            | 135416 | Only sampled Nyanza Province in Kenya.                                        |



|             |                                          |           |                                                                                                                                                                                                                                                          |             |                                         |
|-------------|------------------------------------------|-----------|----------------------------------------------------------------------------------------------------------------------------------------------------------------------------------------------------------------------------------------------------------|-------------|-----------------------------------------|
| Kenya       | Multiple Indicator Cluster Survey (MICS) | 2013-2014 | Kenya - Bungoma County Multiple Indicator Survey 2013-2014. New York, United States: United Nations Children's Fund (UNICEF), 2015.                                                                                                                      | 203654<br>† | Only sampled Bungoma County in Kenya.   |
| Kenya       | Multiple Indicator Cluster Survey (MICS) | 2013-2014 | Kenya - Kakamega County Multiple Indicator Survey 2013-2014. New York, United States: United Nations Children's Fund (UNICEF), 2015.                                                                                                                     | 203663<br>† | Only sampled Kakamega County in Kenya.  |
| Kenya       | Multiple Indicator Cluster Survey (MICS) | 2013-2014 | Kenya - Turkana County Multiple Indicator Survey 2013-2014. New York, United States: United Nations Children's Fund (UNICEF), 2015.                                                                                                                      | 203664<br>† | Only sampled Turkana County in Kenya.   |
| Somalia     | Multiple Indicator Cluster Survey (MICS) | 2011      | Ministry of National Planning and Development (Somaliland), United Nations Children's Fund (UNICEF). Somalia - Somaliland Multiple Indicator Cluster Survey 2011. New York, United States: United Nations Children's Fund (UNICEF), 2015.                | 91507       | Only sampled Somaliland.                |
| Somalia     | Multiple Indicator Cluster Survey (MICS) | 2011      | Puntland Ministry of Planning and International Cooperation (Somalia), United Nations Children's Fund (UNICEF). Somalia - Northeast Zone Multiple Indicator Cluster Survey 2011. New York, United States: United Nations Children's Fund (UNICEF), 2015. | 91508       | Only sampled Northeast Zone in Somalia. |
| South Sudan | Multiple Indicator Cluster Survey (MICS) | 1999      | United Nations Children's Fund (UNICEF). South Sudan Multiple Indicator Cluster Survey 1999. New York, United States: United Nations Children's Fund (UNICEF).                                                                                           | 12232       | Sampled before Sudan split.             |

\*NID = Data source unique identifier in the Global Health Data Exchange (GHDx) (<http://ghdx.healthdata.org/>). Additional information about each data source is available via the GHDx, including information about the data provider and links to where the data can be accessed or requested (where available). NIDs can be entered in the search bar to retrieve the record for a particular source.

†Data source is not publicly available due to restrictions by the data provider and was used under license for the current study.

**Supplementary Table 11. National and subnational achievement of WHO GNT (2017)**

| <b>WHO GNT met at national level</b>                                                                                              | <b>WHO GNT met for all first administrative units</b> | <b>WHO GNT met for all second administrative units</b> |
|-----------------------------------------------------------------------------------------------------------------------------------|-------------------------------------------------------|--------------------------------------------------------|
| Burundi<br>Eritrea<br>Ethiopia<br>Lesotho<br>Liberia<br>Malawi<br>Rwanda<br>São Tomé and Príncipe<br>Tanzania<br>Uganda<br>Zambia | Burundi<br>Malawi<br>Rwanda<br>São Tomé and Príncipe  | Malawi<br>Rwanda<br>São Tomé and Príncipe              |

**Supplementary Table 12. National and subnational achievement of WHO GNT (2025)**

| <b>WHO GNT met at national level</b>                                                                                                                                                                                                                    | <b>WHO GNT met for all first administrative units</b>                                                      | <b>WHO GNT met for all second administrative units</b> |
|---------------------------------------------------------------------------------------------------------------------------------------------------------------------------------------------------------------------------------------------------------|------------------------------------------------------------------------------------------------------------|--------------------------------------------------------|
| Angola<br>Burkina Faso<br>Burundi<br>Democratic Republic of the Congo<br>Eritrea<br>Ethiopia<br>Guinea-Bissau<br>Lesotho<br>Liberia<br>Malawi<br>Mauritania<br>Rwanda<br>São Tomé and Príncipe<br>Sierra Leone<br>Sudan<br>Tanzania<br>Uganda<br>Zambia | Burundi<br>Guinea-Bissau<br>Lesotho<br>Malawi<br>Rwanda<br>São Tomé and Príncipe<br>Sierra Leone<br>Zambia | Guinea-Bissau<br>Rwanda<br>São Tomé and Príncipe       |
